1 **Druggable genome screen identifies new regulators of the abundance and toxicity of**  
2 **ATXN3, the Spinocerebellar Ataxia Type 3 disease protein**

3

4 Naila S. Ashraf<sup>1</sup>, Joanna R. Sutton<sup>2</sup>, Yemen Yang<sup>1</sup>, Bedri Ranxhi<sup>2</sup>, Kozeta Libohova<sup>2</sup>, Emily D.  
5 Shaw<sup>1</sup>, Anna J. Barget<sup>1</sup>, Sokol V. Todi<sup>2,3</sup>, Henry L. Paulson<sup>1\*</sup>, Maria do Carmo Costa<sup>1\*</sup>

6

7 <sup>1</sup>Department of Neurology, Michigan Medicine, University of Michigan, Ann Arbor, MI, USA;

8 <sup>2</sup>Department of Pharmacology, Wayne State University School of Medicine, Detroit, MI, USA;

9 <sup>3</sup>Department of Neurology, Wayne State University School of Medicine, Detroit, MI, USA.

10

11

12 **\*Corresponding authors:**

13 Henry L. Paulson, M.D., Ph.D.

14 Department of Neurology, Michigan Medicine, University of Michigan

15 A. Alfred Taubman Biomedical Sciences Research Building, Room 4001

16 109 Zina Pitcher Place, Ann Arbor, MI 48109-2200, USA

17 Phone: +1 734-615-5632

18 E-mail address: [henryp@med.umich.edu](mailto:henryp@med.umich.edu)

19

20 Maria do Carmo Costa, Ph.D.

21 Department of Neurology, Michigan Medicine, University of Michigan

22 A. Alfred Taubman Biomedical Sciences Research Building, Room 4027

23 109 Zina Pitcher Place, Ann Arbor, MI 48109-2200, USA

24 Phone: +1 734-764-4094

25 E-mail address: [mariadoc@med.umich.edu](mailto:mariadoc@med.umich.edu)

26

27 **Abstract**

28 **Background:** Spinocerebellar Ataxia type 3 (SCA3, also known as Machado-Joseph disease)  
29 is a neurodegenerative disorder caused by a CAG repeat expansion encoding an abnormally  
30 long polyglutamine (polyQ) tract in the disease protein, ataxin-3 (ATXN3). No preventive  
31 treatment is yet available for SCA3. Because SCA3 is likely caused by a toxic gain of ATXN3  
32 function, a rational therapeutic strategy is to reduce mutant ATXN3 levels by targeting pathways  
33 that control its production or stability. Here, we sought to identify genes that modulate ATXN3  
34 levels as potential therapeutic targets in this fatal disorder.

35 **Methods:** We screened a collection of siRNAs targeting 2742 druggable human genes using a  
36 cell-based assay based on luminescence readout of polyQ-expanded ATXN3. From 317  
37 candidate genes identified in the primary screen, 100 genes were selected for validation.  
38 Among the 33 genes confirmed in secondary assays, 15 were validated in an independent cell  
39 model as modulators of pathogenic ATXN3 protein levels. Ten of these genes were then  
40 assessed in a *Drosophila* model of SCA3, and one was confirmed as a key modulator of  
41 physiological ATXN3 abundance in SCA3 neuronal progenitor cells.

42 **Results:** Among the 15 genes shown to modulate ATXN3 in mammalian cells, orthologs of  
43 *CHD4*, *FBXL3*, *HR* and *MC3R* regulate mutant ATXN3-mediated toxicity in fly eyes. Further  
44 mechanistic studies of one of these genes, *FBXL3*, encoding a F-box protein that is a  
45 component of the SKP1-Cullin-F-box (SCF) ubiquitin ligase complex, showed that it reduces  
46 levels of normal and pathogenic ATXN3 in SCA3 neuronal progenitor cells, primarily via a SCF  
47 complex-dependent manner. Bioinformatic analysis of the 15 genes revealed a potential  
48 molecular network with connections to tumor necrosis factor- $\alpha$ /nuclear factor-kappa B (TNF/NF-  
49 kB) and extracellular signal-regulated kinases 1 and 2 (ERK1/2) pathways.

50 **Conclusions:** We identified 15 druggable genes with diverse functions to be suppressors or  
51 enhancers of pathogenic ATXN3 abundance. Among identified pathways highlighted by this

52 screen, the FBXL3/SCF axis represents a novel molecular pathway that regulates physiological  
53 levels of ATXN3 protein.

54

55 **Keywords:** polyglutamine, spinocerebellar ataxia, Machado-Joseph disease,  
56 neurodegeneration, high-throughput screen, human embryonic stem cells, *Drosophila*

57

## 58 **Introduction**

59 The polyglutamine (polyQ) diseases are inherited neurodegenerative diseases caused by  
60 expanded CAG repeats that encode abnormally long glutamine repeats in the disease proteins  
61 [1, 2]. Spinocerebellar Ataxia type 3 (SCA3) is one of nine known polyQ disorders and the most  
62 common dominant ataxia, primarily manifesting with degeneration of the cerebellum, brainstem,  
63 spinal cord, and basal ganglia [3-7]. The CAG repeat in the *ATXN3* gene, which normally is 12  
64 to 44 triplets, becomes expanded to ~60 to 87 repeats in SCA3 [8, 9]. Despite sharing a  
65 propensity to misfold and aggregate, polyQ disease proteins differ in size, cellular localization  
66 and biological function. Moreover, polyQ disorders show distinctive symptomatology and  
67 neuropathology, indicating that the specific protein context in which expanded polyQ is  
68 embedded influences the pathogenic mechanisms in each disease [2].

69 While many advances have been made in understanding pathomechanisms and promising  
70 therapies may be on the horizon for polyQ diseases, no disease-modifying treatments exist yet.  
71 Reducing levels of mutant *ATXN3* transcripts and/or protein using nucleotide-based approaches  
72 or small molecules has been reported by us and others as an encouraging therapeutic strategy  
73 for SCA3 [10-19]. Another route to suppressing polyQ disease protein abundance in the  
74 mammalian brain is to manipulate specific pathways used by cells to control mutant protein  
75 production, stability, or clearance. Unfortunately, the mechanisms underlying cellular handling of  
76 *ATXN3* and other mutant polyQ proteins remain poorly understood.

77 Here, we carried out an unbiased druggable genome siRNA screen in a cell-based assay to  
78 identify genes and pathways that modulate levels of expanded-polyQ ATXN3. Downstream  
79 validation of identified genes was then performed in *Drosophila* models of SCA3 and neuronal  
80 progenitor cells (NPCs) derived from human embryonic stem cells (hESCs) harboring an  
81 expanded CAG repeat in *ATXN3*. We identified novel genes that regulate ATXN3 levels in  
82 mammalian cells and modulate mutant ATXN3-mediated toxicity in *Drosophila*, suggesting new  
83 therapeutic targets in SCA3 and perhaps similar disorders.

84

## 85 **Materials and Methods**

86

### 87 **Druggable genome siRNA primary screen**

88 High-throughput screens were carried out at the University of Michigan Center for Chemical  
89 Genomics (CCG). We screened the druggable genome subset of the human siGENOME siRNA  
90 SMARTpool library (Dharmacon) targeting 2742 genes. Each library stock plate comprising 280  
91 siRNA SMART-pools targeting druggable genes and four internal library siRNA controls for  
92 viability at 500 nM was screened in triplicate by reverse transfection of stably transfected  
93 293/ATXN3Q81:FF-Luc (ATXN3-Luc) cells. Sample siRNAs were screened at a final  
94 concentration of 50 nM and control siGENOME siRNAs (RISC-Free Non-targeting, and  
95 SMARTpools for ATXN3 and BECLN1) at 20 nM. siRNAs (4  $\mu$ L) were transferred from each  
96 library stock plate (500 nM) and a control stock plate (200 nM) to three 384-well black tissue  
97 culture-treated assay plates (Greiner-Bio CellStar) using Biomek FX (Beckman Coulter,  
98 Fullerton, CA) (Supplementary Figure 1). Lipofectamine RNAiMAX transfection reagent (Thermo  
99 Fisher Scientific) was diluted in OPTIMEM (Thermo Fisher Scientific) (0.1  $\mu$ L of RNAiMax + 5.9  
100  $\mu$ L of OPTIMEM) and 6  $\mu$ L of the mixture were added per well to the assay plates containing the  
101 siRNAs using an automated dispenser (Multidrop Combi, Thermo Fisher). Plates were briefly



102 centrifuged and incubated at room temperature (RT) for 30 min. ATXN3-Luc cells in DMEM/  
103 10% fetal bovine serum were added to the assay plates ( $10^4$  cells in 30  $\mu$ L per well) and briefly  
104 centrifuged. Cell lysis buffer (Promega) (10  $\mu$ L) was added to wells A1, A24, P1 and P24  
105 (positive controls for viability) and plates were incubated at 37°C, 5% CO<sub>2</sub> for 48 hours. After  
106 incubation, medium was aspirated leaving about 10  $\mu$ L per well, and 5  $\mu$ L of CellTiter-Fluor Cell  
107 Viability Assay reagent (Promega) was added to each well. Plates were incubated at 37°C, 5%  
108 CO<sub>2</sub> for 1 hour and viability was assessed by fluorescence reading (Exc 390/ Em 505 nm) at the  
109 PHERAstar (BMG Labtech). Ten  $\mu$ L of Steady-Glo Luciferase Assay System were subsequently  
110 added to each well, and after 10 min incubation at room temperature, the activity of firefly  
111 Luciferase was measured by PHERAstar (BMG Labtech). Data was uploaded and computed by  
112 MScreen Database [20] for negative and positive controls on a plate by plate basis. Percent  
113 viability for sample siRNAs was calculated based on Lysed cells (0%) and siRNA control RISC-  
114 Free Nontargeting (100%). The resulting percent luminescence activity for the siRNAs was  
115 computed relative to the negative siRNA control (RISC-Free Nontargeting) at 0% and the  
116 positive siRNA control (targeting ATXN3) at 100%.

117

#### 118 **siRNA confirmation screens**

119 A customized library of four individual siGENOME siRNAs per gene for 100 genes was  
120 screened in parallel in ATXN3-Luc and Luc (counter-screen) cells in triplicate using the above  
121 protocol. Genes for which at least one individual siRNA showed selective activity on the ATXN3-  
122 Luc assay and not on the Luc-assay were considered for follow-up validation.

123

#### 124 **siRNA reverse transfection of stably transfected HEK293 cells**

125 HEK293 cells stably expressing FLAG-ATXN3Q80 [21] were cultured in DMEM/ 10% FBS/ 1%  
126 Penicillin-Streptomycin. Sample individual siGENOME siRNAs were screened at 50 nM and

127 control siRNAs (RISC-Free Non-targeting, and SMARTpool for ATXN3) at 20 nM in 24-well  
128 plate setups. Briefly, 40  $\mu$ L of siRNA were incubated with 60  $\mu$ L of transfection mixture (1  $\mu$ L of  
129 RNAiMax + 59  $\mu$ L of OPTIMEM) for 30 min at room temperature, after which  $10^5$  cells in 300  $\mu$ L  
130 of medium were added per well. Cells were incubated at 37°C, 5% CO<sub>2</sub> for 48 hours.

131

### 132 **Generation and culture of human control and SCA3 neuronal progenitor cells (NPCs)**

133 Control and SCA3 human embryonic stem cells (hESCs), respectively, UM4-6 NIH registry  
134 #0147 and UM134-1 PGD NIH registry #0286), were acquired from the MStem Cell Lab,  
135 University of Michigan. All experiments using hESCs were previously approved by the Human  
136 Pluripotent Stem Cell Research Oversight (HPSCRO) of the University of Michigan (Application  
137 1097). Control and SCA3 NPCs were generated from the respective hESC lines (passages 18  
138 (P18) and 15 (P15), respectively) using the STEMdiff Neural System (STEMCELL  
139 Technologies). Briefly,  $2 \times 10^6$  SCA3 hESCs were resuspended in 2 mL of STEMdiff Neural  
140 Induction Medium (NIM)/ SMADi/ 10  $\mu$ M Y-27632 and plated in one well of a 6-well plate coated  
141 with poly-L-ornithine (PLO) and laminin (lam) and incubated at 37°C, 5% CO<sub>2</sub>. Daily full medium  
142 changes were performed with NIM/ SMADi until Day 6, when cells (80-90% confluent) were  
143 passaged into two 60 mm plates coated with PLO/lam (P1) using ACCUTASE and NIM/ SMADi/  
144 10  $\mu$ M Y-27632. Medium was changed daily and cells were passaged as above at Day 10 (P2).  
145 At Day 13 (P3), cells were passaged and plated in STEMdiff Neural Progenitor Medium (NPM)  
146 and since then cells were expanded and maintained in NPM. Control and SCA3 NPCs (P4)  
147 were evaluated for expression of NPC markers and cells of passage four or higher were frozen  
148 in STEMdiff Neural Progenitor Freezing Medium in liquid nitrogen. Cells were thawed and re-  
149 expanded as needed for experiments.

150

### 151 **Electroporation of SCA3 neuronal progenitor cells (NPCs)**

152 Approximately  $10^6$  SCA3 NPCs (P8-P11) were electroporated with 1  $\mu$ g of pCMV-  
153 SPORT6.FBXL3 (Dharmacon, MHS6278-202759846) or 1  $\mu$ g of pCMV-SPORT6.FBXL3 and 40  
154 nM ON-TARGETplus human CUL1 (8454) siRNA SMARTpool (Dharmacon, L-004086) using  
155 the Neon transfection system (Invitrogen) following the manufacturer instructions and 1400 V,  
156 20 ms, 2 pulses per condition. Cells were plated in 1.5 mL of NPM of a 12-well plate and  
157 incubated at 37°C, 5% CO<sub>2</sub>. Medium was changed after 32 hours either with NPM or NPM/ 2  
158  $\mu$ M MLN4924 and cells were incubated for 16 additional hours. Forty-eight hours after  
159 transfection, cells were collected in 200  $\mu$ L of RIPA buffer/ COMPLETE (Roche Diagnostics)/  
160 PhosSTOP (Sigma) for protein extraction or 200  $\mu$ L of RLT buffer (Qiagen) for RNA extraction  
161 and stored at -80°C until further sample processing.

162

### 163 **Western Blotting**

164 Total proteins from mammalian cells were extracted from cells by resuspension and  
165 homogenization in RIPA buffer containing protein inhibitors (Complete, Roche Diagnostics) and  
166 phosphatase inhibitors (Phospho-STOP, Sigma), followed by sonication and centrifugation at  
167 4°C. Supernatants (soluble proteins) were collected and total proteins were quantified using the  
168 BCA method (Pierce). For fly-based samples, 10 dissected heads per group were mechanically  
169 homogenized in boiling 2% SDS lysis buffer, sonicated, boiled for 10 minutes and centrifuged at  
170 14,400 X g before loading. Total protein lysates (20  $\mu$ g) were resolved in 10% SDS-PAGE gels,  
171 and corresponding PVDF membranes were incubated overnight at 4°C with primary antibodies:  
172 mouse anti-ATXN3 (1H9) (1:2000, MAB5360, Millipore), rabbit anti-MJD [22] (1:20000), rabbit  
173 anti-FBXL3 (1:500, ab96645, Abcam ), rabbit anti-CUL1 (EPR3103Y) (1:1000, ab75817,  
174 Abcam), and rabbit anti- $\alpha$ -Tubulin (11H10) (1:10000, #2125, Cell Signaling Technology).  
175 Primary antibodies were detected by incubation with peroxidase-conjugated anti-mouse and  
176 anti-rabbit antibodies (1:10000, Jackson Immuno Research Laboratories) followed by reaction

177 with ECL-Plus reagent (Western Lighting, PerkinElmer) and exposure to autoradiography films.

178 Film band intensity was quantified by densitometry by Image J.

179

## 180 **Immunofluorescence**

181 PLO/lam-coated coverslips with SCA3 NPCs were washed with PBS, fixed with 4%

182 paraformaldehyde/ PBS for 15 min, washed three times with PBS and stored at 4°C until further

183 processing. Cells were permeabilized with 0.5% Triton X-100/ PBS for 20 min, washed with

184 Tween-20/ PBS (PBS-T), blocked in 5% goat serum/ PBS for one hour, and incubated overnight

185 at 4°C with primary antibodies diluted in 5% goat serum/ PBS: rabbit anti-PAX6 (1:250, 60433S,

186 Cell Signaling), rabbit anti-SOX1 (1:1000, 4194S, Cell Signaling), mouse anti-NESTIN (1:250,

187 33475S, Cell Signaling), rabbit anti-MJD (1:1000), and mouse anti-ATXN3 (1H9) (1:250,

188 MAB5360, Millipore). Cells were washed with PBS-T, incubated with corresponding secondary

189 antibodies goat anti-rabbit and anti-mouse conjugated with Alexa Fluor 488 or 568 (1:1000,

190 Invitrogen) diluted in 5% goat serum/ PBS for 1h, incubated with DAPI for 10 min, and washed

191 with PBS-T. Immunostained coverslips were then mounted in slides using Prolong Gold medium

192 (Invitrogen) and saved at 4°C until imaged on a Nikon A1 high sensitivity confocal microscope.

193

## 194 **RNA extraction and quantitative RT-PCR**

195 Total RNA from cells was extracted using the RNeasy mini kit (Qiagen) following manufacturer's

196 instructions. Reverse transcription of 1 µg of total RNA per sample was performed using the

197 iScript cDNA synthesis kit (Bio-RAD). Transcript levels were determined by quantitative real-

198 time RT-PCR as previously reported [14] using primers provided in Supplementary Table 1 and

199 normalizing expression to *ATCB* transcript levels.

200

## 201 ***Drosophila* experiments**

202 For all stocks and for experimental procedures, adult males and virgin females were crossed,  
203 raised and maintained at 25°C under diurnal conditions in standard cornmeal media. All  
204 examined flies were heterozygous for driver and transgenes. Once offspring emerged from  
205 pupal cases, they were aged under the same conditions described above for seven days, at  
206 which time heads were dissected and imaged using an Olympus BX53 microscope equipped  
207 with a DP72 digital camera for GFP fluorescence experiments, or whole flies were fixed and  
208 processed for histological sections, described below. Fluorescence from each eye was  
209 quantified using the publicly available ImageJ software. Average retinal fluorescence for each  
210 treatment condition was calculated as previously described [23-27]. RNAi fly lines used for the  
211 work described in this manuscript are listed in Supplementary Table 2. The GMR-Gal4 driver  
212 (#8605) and UAS-mCD8-GFP (#5137) were from the Bloomington *Drosophila* Stock center. The  
213 UAS-ataxin-3Q77 line has been described before [13, 28]. For histological sections, adult fly  
214 wings and proboscises were removed, and flies were fixed in 2% glutaraldehyde/ 2%  
215 paraformaldehyde in Tris-buffered saline with 0.1% Triton X-100. The fixed flies were  
216 dehydrated in a series of 30%, 50%, 75%, and 100% ethanol, and 100% propylene oxide.  
217 Dehydrated specimens were embedded in Poly/Bed812 (Polysciences) and fly heads were  
218 sectioned at 5 µm. Sectioned heads were stained with toluidine blue.

219

## 220 **Bioinformatic analysis**

221 Gene lists were analyzed for biological functions and network analysis was performed with the  
222 Ingenuity Pathway Analysis software (Qiagen) using the whole-human genome as the reference  
223 gene set and known direct and indirect gene relationships.

224

## 225 **Statistical analysis**

226 Levels of proteins and transcripts, and fluorescence in *Drosophila* were compared using one-  
227 tailed or two-tailed student's t-test. A  $P < 0.05$  was considered statistically significant for all  
228 analyses. Data were analyzed using IBM SPSS Statistics 22.

229

## 230 **Results**

### 231 **Mammalian cell-based siRNA screen identifies modulators of pathogenic ATXN3**

232 To identify genes that regulate levels of pathogenic ATXN3 in mammalian cells, we used our  
233 previously developed ATXN3-Luc cellular assay (Figure 1A,B) [13] to screen the druggable  
234 genome subset of the human siGENOME siRNA library (Dharmacon). This library comprises  
235 SMARTpools of four individual siRNAs targeting 2742 genes that are considered potential  
236 therapeutic targets, including G-protein coupled receptors (GPCRs), ion channels, protein  
237 kinases, proteases, phosphatases and ubiquitin conjugation enzymes  
238 (<https://dharmacon.horizondiscovery.com/rnai/>). The ATXN3-Luc assay measures  
239 chemiluminescence in HEK293 cells stably overexpressing FLAG-tagged human ATXN3  
240 harboring an expanded polyQ repeat in the disease range (Q81) fused to firefly Luciferase,  
241 under the control of a CMV promoter (Figure 1A,B) [13]. We reasoned that by screening for  
242 steady state levels of the ATXN3/Luciferase fusion protein (reported as chemiluminescence),  
243 and because its expression is driven by the CMV promoter, we would identify genes that  
244 regulate ATXN3 abundance at post-transcriptional steps (e.g. mRNA stability/degradation, and  
245 protein translation, folding and turnover). To circumvent false-positive siRNAs that interfere with  
246 CMV promoter activity or Luciferase itself, we developed a counter-screen assay for use in  
247 confirmation/ validation screens: HEK293 cells stably overexpressing firefly Luciferase  
248 controlled by the CMV promoter (Luc assay) (Figure 1A,B).

249 We performed the primary screen in ATXN3-Luc cells, employing a 384-well plate format  
250 with pools of four individual siRNAs targeting a single gene per well. Pooled siRNAs were tested  
251 in triplicate plates for their efficacy to decrease or increase levels of luminescence and to affect

252 cell viability (Figure 1C). All plates included built-in controls for luminescence and cell viability  
253 readouts (Supplementary Figure 1): 1) siGENOME RISC-Free Non-Targeting was used as a  
254 negative control for both readouts; 2) pooled siGENOME siRNAs targeting ATXN3 were used  
255 as a positive control for suppressors of luminescence; 3) because BECN1 was shown to clear  
256 ATXN3 in SCA3 mouse models [29, 30], pooled siGENOME siRNAs against BECN1 were used  
257 as positive control for enhancers of luminescence; and 4) cell lysis buffer was used as a positive  
258 control for suppressors of cell viability.

259 A total of 33 plates were screened in two assays, showing an average plate Z factor of  
260 0.82 for luminescence assessment. Some hits that reduce luminescence may be false positives  
261 due to cell death caused by depletion of an essential gene; thus, to identify genes whose  
262 knockdown decreases levels of ATXN3 with minimal cell toxicity, we only considered hits that  
263 showed cell viability higher than 70% relative to controls. siRNA pools for 317 genes passed this  
264 viability cutoff and led to statistically significant increased (N=163) or decreased (N=154)  
265 luminescence of at least 50% relative to negative control.

266 These 317 identified candidate genes were similarly distributed throughout the screened  
267 protein families: kinases (N=73 of 675, 10.8%), followed by peptidases (N=44 of 412, 10.7%),  
268 G-protein coupled receptors (N=43 of 364, 11.8%), proteins with other functions (N=41 of 271,  
269 15.1%), ion channels (N=38 of 304, 12.5%), enzymes (N=32 of 311, 10.3%), phosphatases  
270 (N=30 of 247, 12.1%), transcription regulators (N=10 of 89, 11.9%), transmembrane receptors  
271 (N=3 of 39, 7.7%), transporters (N=2 of 29, 7.7%), and growth factors (N=1 of 2, 50%)  
272 (Supplementary Figure 2). Analysis of subcellular localization of these 317 genes showed that  
273 they are mainly distributed through the cytoplasm (N=116), plasma membrane (N=111) and  
274 nucleus (N=51) (Supplementary Figure 2).

275 Among these 317 hits, we selected 100 genes for confirmation: the top 80 genes whose  
276 knockdown decreased luminescence by at least 60%, and the top 20 genes whose knockdown  
277 increased luminescence by at least 100% (Figure 1C). We chose to select more genes whose



278 knockdown reduced luminescence because our primary goal is to identify therapeutically  
279 compelling targets, and it is more feasible to knock down or suppress the activity of a modifier  
280 gene as a therapeutic approach. In the confirmation screens, we assessed in parallel the four  
281 individual siGENOME siRNAs per gene in ATXN3-Luc and Luc cells (Figure 1C). For 33 of the  
282 100 genes, we confirmed that at least one siRNA selectively and significantly modulated  
283 luminescence levels in ATXN3-Luc cells (Supplementary Table 2): 15 were genes whose  
284 knockdown decreased luminescence, and 18 were genes whose knockdown increased  
285 luminescence (Figure 1C).

286

### 287 **Fifteen genes confirmed to regulate ATXN3 levels in an independent SCA3 cell line**

288 We next tested whether knockdown of these 33 genes (Supplementary Table 2) modulated  
289 levels of ATXN3 in an independent HEK293 cell model stably overexpressing FLAG-tagged  
290 human ATXN3 with a polyQ repeat of 80 (ATXN3Q80 cells) [21]. Cells were transiently  
291 transfected individually with each of the four siRNAs targeting an identified gene. The efficiency  
292 of transcript depletion was confirmed by quantitative RT-PCR (Supplementary Figures 3 and 4),  
293 and levels of ATXN3 protein were assessed by Western blot (Figures 2 and 3). In this  
294 secondary screen, we considered a gene validated as a modifier of ATXN3 abundance if at  
295 least two of the four siRNAs altered levels of expanded ATXN3 in the same direction as in the  
296 primary screen.

297 Using these criteria, we confirmed 15 of the 33 genes (Table 1): three enhancers of  
298 ATXN3 abundance (i.e. gene knockdown resulted in decreased ATXN3Q80 levels) – *MAP3K14*,  
299 *NT5C3A*, and *FASTK* (Figures 2A and B); and twelve suppressors of ATXN3 levels (i.e. gene  
300 knockdown resulted in increased ATXN3Q80 levels) – *CDK8*, *RNF19A*, *SIK3*, *CACNG7*,  
301 *FBXL3*, *FES*, *CHD4*, *HR*, *MC3R*, *PKD2*, *P2RX5*, and *TACR1* (Figures 3A, B, D and E). While  
302 most of these genes modulated the abundance of both expanded ATXN3Q80 and endogenous  
303 wild-type ATXN3, three preferentially regulated expanded ATXN3Q80 levels: *MAP3K14*,



304 *RNF19A*, and *FES* (Figures 2 and 3). Bioinformatic analysis of these 15 genes revealed a  
305 potential molecular network with connections to tumor necrosis factor- $\alpha$ /nuclear factor-kappa B  
306 (TNF/NF- $\kappa$ B) and extracellular signal-regulated kinases 1 and 2 (ERK1/2) pathways (Figure 4).

307

### 308 **Orthologs of *CHD4*, *FBXL3*, *HR* and *MC3R* regulate ATXN3Q77-induced toxicity in**

#### 309 ***Drosophila***

310 To assess whether the above findings in two cell models are physiologically relevant *in vivo*, we  
311 tested the efficacy of 10 orthologs of identified genes to alter mutant ATXN3-mediated toxicity in  
312 a *Drosophila* model of SCA3 [13, 28, 31]: *CACNG7*, *CHD4*, *CDK8*, *FASTK*, *FBXL3*, *FES*, *HR*,  
313 *MC3R*, *PKD2*, and *TACR1*. For simplicity, we focused on the fly eye expression model which is  
314 commonly used to examine the role and pathogenicity of various misfolded proteins [32].

315 Expression of pathogenic ATXN3 (Q77) in fly eyes is insufficiently toxic to cause marked  
316 degeneration of external structures [28, 31], necessitating the examination of internal eye  
317 structures for degenerative phenotypes or the use of a membrane-targeted GFP molecule  
318 (CD8-GFP) as a simple readout of the loss of the functional unit of the fly eye, the ommatidium  
319 [23]. Through this second assay, a toxic protein such as pathogenic ATXN3 is expressed in fly  
320 eyes independently of CD8-GFP; whereas the outside part of the fly eye seems unperturbed by  
321 the presence of the toxic protein, internal structures degenerate and photoreceptor cells  
322 disappear, resulting in the loss of GFP fluorescence [23]. Thus, increased GFP fluorescence  
323 reflects improved eye structure, whereas loss of fluorescence signifies internal eye structure  
324 degeneration [23, 25, 26]. In other words, this assay provides a quantifiable degenerative  
325 phenotype (reduced GFP) that facilitates screening [25]. In this model, UAS-CD8-GFP and  
326 UAS-ATXN3Q77 are driven independently by an eye-restricted driver, GMR-Gal4, through the  
327 binary Gal4-UAS system [33]. As shown in Figure 5A, expression of pathogenic ATXN3 in fly  
328 eyes leads to a statistically significant loss of GFP signal, as shown before [23].

329 For each of the 10 genes described above, we crossed RNAi *Drosophila* lines identified  
330 by BLAST analysis and FlyBase reports (Supplementary Table 3) to CD8-GFP & ATXN3Q77  
331 flies, and then quantified GFP signal in dissected fly heads at day 7 (Figures 5B,C). RNAi  
332 targeting seven of 10 genes (orthologs of *CHD4*, *FBXL3*, *FES*, *HR*, *MC3R*, *PKD2*, and *TACR1*)  
333 resulted in statistically significant effects on ATXN3-mediated changes in GFP fluorescence in fly  
334 eyes (Figures 5B,C), consistent with the observed modulation of ATXN3 levels in mammalian  
335 cells (Figures 2 and 3), that is increased toxicity in fly eyes and increased levels of mutant  
336 ATXN3 in cells. In contrast, knockdown of orthologs of *CACNG7*, *CDK18* and *FASTK* in CD8-  
337 GFP & ATXN3Q77 flies led to results incongruent with cell-based data (Figure 5B). To evaluate  
338 the baseline effect of knockdown of these 10 genes on eye toxicity, we crossed the RNAi lines  
339 with CD8-GFP flies in the absence of ATXN3Q77 and observed the following compared with  
340 controls: 1) no differences on GFP signal for crosses with CHD4-1,2,3, FBXL3-1, MC3R-3,  
341 PKD2-1, TACR1-1,2 and FASTK-1 lines; 2) decreased GFP intensity in FES-1, HR-1,2, and  
342 MC3R-2,4 crosses; and 3) increased fluorescence in CACNG7-1, FASTK-2, CDK18-1,2,3 and  
343 PKD2-2 crosses (Supplementary Figure 5). Overall, the baseline toxicity of the RNAi lines on fly  
344 eyes did not interfere with the observed effect on ATXN3-mediated toxicity in crosses of CD8-  
345 GFP & ATXN3Q77 flies.

346 We next evaluated the effect of these seven genes on ATXN3-mediated disruption of  
347 internal eye structures (Figure 6A). Histological analyses of eye sections confirmed that  
348 knockdown of the orthologs for four genes (*CHD4*, *FBXL3*, *HR*, and *MC3R*) enhanced  
349 ATXN3Q77 toxicity (Figure 6A), highlighted by increased separation of retinal structures from  
350 the underlying lamina. While no apparent differences in eye structure were observed in crosses  
351 of ATXN3Q77 with RNAi lines for orthologs of *FES*, *PKD2* and *TACR1*, fly heads from all seven  
352 crosses showed increased levels of ATXN3Q77 protein (Figure 6B and Supplementary Figure  
353 6), in accordance with our expectations from the cell-based assays described above (Figure 3).  
354 Among the seven orthologs for which we confirmed modulation of ATXN3Q77-mediated toxicity,

355 *CHD4*, *FBXL3*, *HR*, and *MC3R* surfaced as the top toxicity suppressor genes to pursue further  
356 because gene knockdown resulted in concordant outcomes in all three readouts of toxicity or  
357 protein abundance in flies (fluorescence intensity, histology and Western blot).

358

359 **Overexpression of *FBXL3* suppresses *ATXN3* abundance in a *CUL1*-dependent manner in**  
360 ***SCA3* neuronal progenitor cells (NPCs)**

361 We selected *FBXL3* to further confirm its role in regulating mutant *ATXN3* abundance in human  
362 cells expressing pathogenic *ATXN3* from the endogenous locus, namely *SCA3* hESC-derived  
363 NPCs. *FBXL3* was chosen for further analysis because its protein is directly implicated in  
364 mechanisms of protein degradation. *FBXL3* encodes a F-box protein that is a component of the  
365 ubiquitin protein ligase complex SKP1-Cullin1-F-box (SCF) involved in ubiquitin-dependent  
366 protein degradation [34]. We first generated NPCs from control and *SCA3* hESCs [35] and  
367 confirmed that these cells express the markers of neural progenitor lineage PAX6, SOX1 and  
368 Nestin (Figure 7A). In confirming *ATXN3* expression in these cells by immunofluorescence, we  
369 observed increased *ATXN3*-positive puncta in the nucleus and cytoplasm of *SCA3* NPCs  
370 compared to control NPCs (Figure 7B).

371 We overexpressed *FBXL3* in *SCA3* NPCs and confirmed that high levels of *FBXL3*  
372 reduce endogenous levels of both wild-type and mutant *ATXN3* proteins to 58% and 64%,  
373 respectively, of control levels (Figure 7C). To evaluate if *FBXL3*-mediated reduction of *ATXN3*  
374 abundance occurs via the SCF/*CUL1* ubiquitination complex, we co-electroporated plasmid  
375 overexpressing *FBXL3* while also decreasing *CUL1* with siRNAs against *CUL1* (Figure 7C).  
376 Knockdown of *CUL1* abolished *FBXL3*-mediated reduction of normal *ATXN3*, but only  
377 accounted for about half of the observed *FBXL3*-facilitated decrease of pathogenic *ATXN3*  
378 (Figure 7C), suggesting that *FBXL3* handles or recognizes normal and mutant *ATXN3*  
379 differently. Overexpression of *FBXL3* and knockdown of *CUL1* were confirmed at the transcript  
380 level (Supplementary Figure 7). *ATXN3* transcript levels, although variable across experiments,

381 were actually higher when FBXL3 was overexpressed, with or without knockdown of CUL1  
382 (Supplementary Figure 7) indicating that the observed FBXL3-mediated reduction of ATXN3  
383 levels occurs at the protein rather than transcriptional level, as expected.

384 To further explore the role of FBXL3/SCF in modulating ATXN3 protein levels we treated  
385 SCA3 NPCs with MLN-4924, an inhibitor of Cullin-RING E3 ubiquitin ligase (CRL) activation, in  
386 the presence or absence of FBXL3 overexpression. Baseline MLN-4924 treatment increased  
387 levels of wild-type ATXN3 to 277% of control levels and showed a trend, albeit not statistically  
388 significant, to increase mutant ATXN3 to 131% of controls (Figure 7D). This result implies that  
389 SCF and CRL complexes mediate normal ATXN3 clearance, presumably via ubiquitin-  
390 dependent degradation, to a greater extent than mutant ATXN3 clearance. In addition, the effect  
391 of MLN-4924 on normal ATXN3 was largely countered by overexpressing FBXL3 (134% of  
392 control levels) (Figure 7D). Collectively, while these results implicate SCF and CRL complexes  
393 as regulators of ATXN3 protein levels; they also suggest that the action of FBXL3 on ATXN3  
394 may be multifaceted. The fact that FBXL3 can counter some of the effects of inhibiting SCF and  
395 CRL on wild-type ATXN3, but not pathogenic ATXN3, raises the possibility of differential  
396 regulation of the two forms of ATXN3.

397

## 398 **Discussion**

399 There are currently no disease-modifying therapies for SCA3. Reducing levels of mutant *ATXN3*  
400 transcript or encoded protein, however, has effectively mitigated disease phenotypes in  
401 preclinical trials in SCA3 transgenic mouse models [10-19, 36]. Accordingly, therapeutic  
402 approaches that deplete pathogenic ATXN3 proteins in the SCA3 brain appear promising. While  
403 some evidence suggests that expanded polyQ ATXN3 can be degraded by the proteasome [37-  
404 42] or macroautophagy [43, 44] and that its stability is affected by specific protein interactions  
405 [38, 45, 46], we lack comprehensive knowledge of the pathways controlling the abundance of  
406 mutant ATXN3. Because ATXN3 is a deubiquitinating enzyme that participates in ubiquitin-

407 dependent protein quality control pathways [47-50], the way cells handle this particular protein  
408 could be unusually complex. This knowledge prompted the unbiased druggable genome siRNA  
409 screen reported here, which identified several genes as regulators of ATXN3 protein  
410 abundance. Because proteins encoded by druggable genes can be inhibited or activated by  
411 drugs, the genes discovered here represent compelling therapeutic targets in SCA3 and  
412 possibly other polyQ diseases. Our additional studies of one identified gene, *FBXL3*, also offer  
413 new insights into the cellular pathways by which ATXN3 is likely degraded.

414         Employing an iterative screening platform that leveraged a broad range of methods to  
415 detect changes in pathogenic ATXN3 levels and toxicity, we successively identified: i) 33 of  
416 2742 druggable genes as specific modulators of ATXN3 using a cell-based ATXN3-Luc assay;  
417 ii) 15 of 33 genes whose knockdown significantly decreased or increased levels of pathogenic  
418 ATXN3 protein in a secondary SCA3 cell model; iii) seven of 10 ortholog genes in *Drosophila*  
419 whose knockdown increased mutant ATXN3-mediated toxicity, assessed by fluorescence signal  
420 in eyes of CD8-GFP & ATXN3Q77 flies; and iv) four of seven fly ortholog genes whose  
421 knockdown increased mutant ATXN3 abundance and showed disrupted internal eye structures  
422 in ATXN3Q77 flies. Of these four genes we then selected one, *FBXL3*, for further mechanistic  
423 studies, which showed that *FBXL3* regulates wild-type and pathogenic ATXN3 levels in human  
424 SCA3 NPCs, primarily via a SCF complex-dependent pathway.

425         Our primary screen identified 317 genes equally distributed through the categories of  
426 enhancers (N=163) and suppressors (N=154) of ATXN3-Luc signal in controls. These genes  
427 distributed similarly over different protein function categories, implying that a variety of classes  
428 of proteins are involved at some level with handling ATXN3. This is not an unexpected outcome  
429 since ATXN3 has been implicated in various cellular processes through its DUB activity [3, 47-  
430 52]. Among the genes that arose from secondary assays, fifteen are related to TNF/NF- $\kappa$ B and  
431 ERK1/2 pathways, indicating that pathogenic ATXN3 levels may be affected by TNF- or  
432 mitogen-dependent signaling. TNF, a cytokine mainly produced by glial cells in the brain, either

433 promotes inflammation through the NF- $\kappa$ B pathway and apoptotic cell death, or is  
434 neuroprotective, depending on the precise receptors it binds to [53]. The mitogen-activated  
435 protein kinases (MAPKs) ERK1/2, also connected with the TNF/NF- $\kappa$ B pathway, likewise can  
436 either promote neuronal survival or neuronal death [54]. Glia is understudied in SCA3, but  
437 several recent findings suggest key roles for glia and inflammatory signaling in SCA3: early  
438 transcriptional changes in SCA3 mouse oligodendrocytes [55], the contribution of astrocyte-like  
439 glia to non-cell autonomous degeneration in SCA3 flies [56], and neuroprotection from the  
440 NSAID ibuprofen in a SCA3 mouse model [57]. Our findings that pathogenic ATXN3 protein  
441 levels can be regulated by TNF/NF- $\kappa$ B and ERK1/2 pro-inflammatory and cell death/survival  
442 pathways highlight the need for further investigation of their role in SCA3.

443 Genes and proteins that regulate pathogenic ATXN3 abundance and toxicity yet have a  
444 limited number of substrates and/or effectors would be ideal targets for intervention in SCA3.  
445 Among such candidates, the F-box protein FBXL3, which binds substrates and promotes their  
446 ubiquitination and subsequent degradation [34], peaked our interest. Our observation that  
447 FBXL3 regulates levels of endogenous wild-type and pathogenic ATXN3 in human SCA3 NPCs,  
448 supports the view that ATXN3 is a substrate for FBXL3 under physiological conditions reflective  
449 of the human disease. While only a few FBXL3 substrates have been validated, 141 proteins  
450 were recently identified as being potentially recruited to SCF<sup>FBXL3</sup> complexes by cryptochromes  
451 CRY1 and CRY2, which are themselves FBXL3 substrates [58-60]. It remains, however, to be  
452 determined whether targeting FBXL3 will prove to be a viable therapeutic strategy in SCA3. On  
453 the one hand, null *FBXL3* mutations cause autosomal recessive developmental delay and  
454 intellectual disability [61] suggesting that FBXL3 mediates the stability of numerous proteins and  
455 that complete loss of FBXL3 function is harmful for cells, at least during development. On the  
456 other hand, *FBXL3* knockdown in our mammalian cell lines and in flies did not show  
457 accompanying toxicity (Supplementary Table 2 and Supplementary Figure 5). Further studies  
458 will be needed to establish whether increasing or decreasing FBXL3 has effects on the fully

459 developed adult brain, which is the relevant target in age-related neurodegenerative diseases  
460 such as SCA3.

461 If *FBXL3* knockdown increases ATXN3 abundance, then its overexpression would be  
462 expected to decrease ATXN3 protein levels. Exogenous expression of *FBXL3* in SCA3 NPCs  
463 indeed reduced the levels of both wild-type and pathogenic ATXN3. The potential role of the  
464 SCF and potentially other CRL complexes in ubiquitinating and regulating ATXN3 levels  
465 appears to span to both wild-type and pathogenic forms of this DUB. Supporting evidence for  
466 the particular involvement of the SCF complex in ATXN3 ubiquitination comes from a recent  
467 report showing that CUL1 and FBXO33 specifically interact and promote ubiquitination and  
468 solubility of a truncated form of pathogenic ATXN3 [62], and from an independent yeast-two-  
469 hybrid study that identified the mouse homologs Cul1 and Atxn3 as interacting partners (Costa  
470 et al. unpublished observations). As ATXN3 shows both DUB and deneddylase activities *in vitro*  
471 [63], future work should investigate its functions in pathways regulated by SCF and CRL  
472 complexes and the effect that these complexes have on ATXN3.

473

## 474 **Conclusions**

475 We identified 15 druggable genes that implicate the involvement of TNF- or mitogen-  
476 dependent signaling cascades in regulating pathogenic ATXN3 levels. One of these potential  
477 candidates for SCA3 intervention, *FBXL3*, is directly involved in protein quality control and was  
478 effective in modulating the levels of mutant and wild-type ATXN3 under physiological conditions  
479 in human cells. The proteins encoded by these genes and the pathways in which they are  
480 implicated demand further evaluation to understand the pathobiology of SCA3 and to seek  
481 disease-modifying therapies for this fatal disorder.

482

483 **List of Abbreviations:** ATXN3 = ataxin-3; CRL = Cullin-RING E3 ubiquitin ligase; DUB =  
484 deubiquitinating enzyme; GFP + green fluorescent protein; hESC = human embryonic stem cell;



485 MJD = Machado-Joseph disease; NPC = neuronal progenitor cell; PBS = phosphate buffered  
486 saline; polyQ = polyglutamine; RIPA = radioimmunoprecipitation assay buffer; RT = room  
487 temperature; SCA3 = Spinocerebellar ataxia type 3; SCF = SKP1-Cullin1-F-box; SEM =  
488 standard error of the mean.

489

#### 490 **Declarations**

491

#### 492 **Ethics approval**

493 All human embryonic stem cells studies were approved by the Human Pluripotent Stem Cell  
494 Research Oversight (HPSCRO) of the University of Michigan (application 1097).

495

#### 496 **Consent for publication**

497 Not applicable.

498

#### 499 **Availability of data and materials**

500 All data generated or analyzed during this study are included in this article and its  
501 supplementary information files.

502

#### 503 **Competing interests**

504 The authors declare that they have no competing interests.

505

#### 506 **Funding**

507 This work was funded by NINDS/NIH R01NS086778 to S.V.T., National Ataxia Foundation  
508 Pioneer in SCAs Award (2019) to SVT, NINDS/NIH R01NS038712 to H.L.P, Protein Folding  
509 Disease Initiative (PFDI)/ drug screen grant, University of Michigan, to M.C.C and H.L.P, Becky



510 Babcox Research Fund/ pilot research award, University of Michigan, to M.C.C., and National  
511 Ataxia Foundation Young SCA Investigator Award (2015) to M.C.C.

512

### 513 **Authors' Contributions**

514 MCC, HLP and SVT designed the study. NSA, JRS, YY, BR, KL, EDS, AJB, SVT and MCC  
515 executed experiments. NSA, JRS, SVT and MCC analyzed data. MCC prepared the figures and  
516 drafted the manuscript. SVT and HLP reviewed the manuscript critically.

517

### 518 **Authors' Information**

519 NSA, MSc, Research Lab Technician Lead, currently applying to a Physician Assistant Program

520 JRS, Ph.D., Ph.D. student, currently Pharmaceutical Industry Scientist

521 YY, BSc, Research Assistant, currently Pharm. D. Resident

522 BR, BSc, Undergraduate Researcher, currently applying to medical schools

523 KL, M.D., Research Associate

524 EDS, BSc, Research Assistant

525 AJB, BSc, Research Laboratory Technician Associate

526 SVT, Ph.D., Associate Professor & Associate Dean

527 HLP, M.D., Ph.D., Professor

528 MCC, Ph.D., Research Assistant Professor

529

### 530 **Acknowledgements**

531 The authors thank Steve Swanson and Martha J. Larsen from the Center of Chemical Genomics  
532 at the University of Michigan for assistance with high-throughput siRNA screen, Dr. Richard  
533 McEachin for bioinformatics support, and Dr. Garry Smith and Laura Keller for initial training with  
534 hESCs and NPCs.

535

536 **Figure Legends**

537

538 **Figure 1. Unbiased cell-based siRNA screen of the druggable genome identifies novel**

539 **modulators of ATXN3 levels.** A) Schematic of constructs expressing firefly Luciferase by itself  
540 (Luc assay) or FLAG-tagged human ATXN3Q81 fused to Luciferase (ATXN3-Luc assay) in  
541 stably expressing HEK293 cell lines. FF: firefly. B) Western blots with anti-ATXN3 (1H9) and  
542 anti-Luciferase (Luc) antibodies show expression of ATXN3Q81:FF-Luc fusion protein and FF-  
543 Luc, respectively, in ATXN3-Luc and Luc assays. C) Summary of the iterative screens using the  
544 ATXN3-Luc and Luc assays to select 33 genes that modulate levels of mutant ATXN3 for  
545 subsequent studies.

546

547 **Figure 2. Three identified genes increase pathogenic ATXN3 levels in mammalian cells.**

548 A) Representative ATXN3 Western blots confirm the efficacy of two or more siRNAs targeting  
549 *MAP3K14*, *NT5C3*, and *FASTK* in decreasing levels of pathogenic FLAG-tagged human  
550 ATXN3Q80 in a stably expressing HEK293 cell line. Green arrows: siRNAs that effectively  
551 decrease ATXN3 levels. B, C) Histograms show quantification of ATXN3Q80 (B) and  
552 endogenous ATXN3 (end ATXN3) (C) from blots in (A) and another independent experiment.  
553 Bars represent the mean percentage of each protein relative to cells transfected with siRNA  
554 buffer alone, normalized for  $\alpha$ -tubulin ( $\pm$  standard error of mean in two independent  
555 experiments). Green bars represent a statistically significant increase or decrease of ATXN3  
556 levels compared to controls. \*  $P < 0.05$ , \*\*  $P < 0.01$ , and \*\*\*  $P < 0.001$  are from student's t-tests  
557 comparing each siRNA to siRNA buffer control.

558

559 **Figure 3. Twelve identified genes suppress pathogenic ATXN3 abundance in mammalian**

560 **cells.** A, D) Representative Western blots detecting ATXN3 reveal the efficacy of two or more  
561 siRNAs targeting *CDK8*, *RNF19A*, *SIK3*, *CACNG7*, *FBXL3*, *FES*, *CHD4*, *HR*, *MC3R*, *PKD2*, and

562 *P2RX5*, *TACR1* in increasing levels of mutant ATXN3Q80. Red arrows: siRNAs that effectively  
563 increased ATXN3Q80 levels. B, C, E, F) Histograms showing the quantification of ATXN3Q80  
564 (B, E) and endogenous ATXN3 (end ATXN3) (C, F) from blots in (A and D) and another  
565 independent experiment. Bars represent the mean percentage of each protein relative to cells  
566 transfected with siRNA buffer alone, normalized for  $\alpha$ -tubulin ( $\pm$  standard error of mean in two  
567 independent experiments). Red and green bars represent, respectively, statistically significant  
568 increase or decrease of ATXN3 levels compared to controls. \*  $P < 0.05$ , \*\*  $P < 0.01$ , and \*\*\*  
569  $P < 0.001$  are from student's t-tests comparing each siRNA to siRNA buffer control.

570

571 **Figure 4. Molecular network formed by genes identified to modulate levels of pathogenic**  
572 **ATXN3 in HEK293 cells.** IPA analysis of 15 genes reveals a molecular network with  
573 connections to TNF/NF- $\kappa$ B and ERK1/2 pathways. Genes whose knockdown decreased or  
574 increased ATXN3 levels are shown in green or red, respectively. Other genes relevant to the  
575 network but not identified as hits in our screen are don't know depicted in grey. Legend for  
576 biological function of genes/proteins and gene relationships can be consulted at the left of  
577 network.

578

579 **Figure 5. Effect of knockdown of specific fly genes on ATXN3-mediated degeneration.** A)  
580 Expression of expanded ATXN3Q77 leads to degeneration in fly eyes, demonstrated by  
581 reduced CD8-GFP fluorescence. GMR-Gal4 was used to drive the independent expression of  
582 membrane-targeted GFP (CD8-GFP) and mutant ATXN3Q77 in fly eyes. Histograms on the  
583 right show quantification of GFP signal from images on the left and additional independent  
584 repeats. Scale bar: 200  $\mu$ M. \*\*\*  $P < 0.001$  based on student's t-test comparing GFP signal in the  
585 presence of ATXN3Q77 to signal in its absence.  $N \geq 30$  per genotype (note that these images  
586 were collected at a time and with a fluorescent bulb different than the ones in panel C). B)  
587 Quantification of the GFP signal from dissected fly heads that expressed pathogenic

588 ATXN3Q77 as well as RNAi targeting the indicated genes. Numbers in RNAi lines indicate  
589 independent constructs. Grey bars highlight genes whose knockdown had an effect as  
590 expected, based on the observed modulation of ATXN3 levels in mammalian cells, whereas  
591 white bars highlight genes with opposite behavior compared to cell-based assays. Shown are  
592 means  $\pm$  standard deviations.  $N \geq 30$  per genotype. \*  $P < 0.05$ , and \*\*\*  $P < 0.001$  are from  
593 student's t-tests comparing each RNAi line to its respective control. C) Representative images  
594 of dissected fly heads expressing CD8-GFP alongside pathogenic ATXN3Q77 in the absence  
595 (Ctrl) or presence of RNAi targeting the noted genes (grey bars in (B)). Flies in all panels were  
596 seven days old. Numbers on the left side denote different RNAi transgenes used for targeted  
597 genes. All flies for the experiments shown here (C) and others that were used for quantification  
598 (B) were collected at the same time and imaged with the same fluorescent bulb. Scale bar: 200  
599  $\mu\text{M}$ .

600

601 **Figure 6. Depletion of four fly genes increases ATXN3-dependent toxicity in fly eyes. A)**

602 Representative images of histological sections from fly eyes expressing pathogenic ATXN3Q77  
603 in the absence (Ctrl) or presence of RNAi constructs targeting the indicated genes. Numbers on  
604 the left indicate that more than one RNAi line was used for each gene. Scale bar: 50  $\mu\text{M}$ . White  
605 asterisks (\*) highlight separation of basal retinal structures. White brackets highlight shortening  
606 of ommatidial length. B) Graph showing the quantification of ATXN3Q77 protein Western blot  
607 bands detected by anti-MJD antibody (Supplementary Figure 6) relative to controls in fly heads  
608 from crosses of ATXN3Q77 flies with RNAi lines for selected genes, normalized to total protein  
609 levels measured by Direct Blue 71. Bars show means  $\pm$  standard deviations.  $N \geq 3$  independent  
610 experimental repeats. Red histograms show increased levels of ATXN3 compared to controls. \*  
611  $P < 0.05$  is from student's t-tests comparing each RNAi line to its respective control.

612

613 **Figure 7. FBXL3 suppresses ATXN3 levels in SCA3 neuronal progenitor cells (NPCs).** A)  
614 Control (CTRL) and SCA3 NPCs showing immunostaining for NPC markers PAX6 (white),  
615 SOX1 (white) and Nestin (green). B) CTRL and SCA3 NPCs immunostained for ATXN3 (red)  
616 using anti-MJD antibody. Nuclei were stained with DAPI (blue). Photographs are 2  $\mu$ m z-stacks  
617 acquired by confocal imaging. Scale bar: 25  $\mu$ m. C) Western blots detecting ATXN3 (anti-MJD)  
618 in protein extracts of SCA3 NPCs overexpressing FBXL3, with or without concomitant siRNA-  
619 mediated knockdown of CUL1 for 48 hours. D) Representative immunoblot blot detecting  
620 ATXN3 (anti-MJD) in SCA3 NPCs overexpressing FBXL3 for 48 hr and treated with 2  $\mu$ M of  
621 CUL1 inhibitor MLN-4924 for the final 16 hours. Quantification of bands corresponding to mutant  
622 and normal ATXN3 are shown in the accompanying graphs. Bars represent the mean  
623 percentage of ATXN3 relative to mock-electroporated cells and normalized to total protein levels  
624 measured by Direct Blue 71 ( $\pm$  SEM) in three independent experiments. Red and green bars  
625 represent, a statistically significant increase or decrease, respectively, of ATXN3 levels  
626 compared to controls. \*  $P < 0.05$  is from one-tailed  $t$ -test comparing the different conditions.  
627

## 628 **References**

- 629 1. Orr HT, Zoghbi HY: **Trinucleotide repeat disorders.** *Annu Rev Neurosci* 2007, **30**:575-621.
- 630 2. Williams AJ, Paulson HL: **Polyglutamine neurodegeneration: protein misfolding**  
631 **revisited.** *Trends Neurosci* 2008, **31**:521-528.
- 632 3. Costa Mdo C, Paulson HL: **Toward understanding Machado-Joseph disease.** *Prog*  
633 *Neurobiol* 2012, **97**:239-257.
- 634 4. Paulson H: **Spinocerebellar Ataxia Type 3.** 1993.
- 635 5. Coutinho P, Andrade C: **Autosomal dominant system degeneration in Portuguese**  
636 **families of the Azores Islands. A new genetic disorder involving cerebellar,**

- 637            **pyramidal, extrapyramidal and spinal cord motor functions.** *Neurology* 1978, **28**:703-  
638            709.
- 639    6.        Schols L, Bauer P, Schmidt T, Schulte T, Riess O: **Autosomal dominant cerebellar ataxias:**  
640            **clinical features, genetics, and pathogenesis.** *Lancet Neurol* 2004, **3**:291-304.
- 641    7.        Ashizawa T, Oz G, Paulson HL: **Spinocerebellar ataxias: prospects and challenges for**  
642            **therapy development.** *Nat Rev Neurol* 2018, **14**:590-605.
- 643    8.        Lima M, Costa MC, Montiel R, Ferro A, Santos C, Silva C, Bettencourt C, Sousa A, Sequeiros J,  
644            Coutinho P, Maciel P: **Population genetics of wild-type CAG repeats in the Machado-**  
645            **Joseph disease gene in Portugal.** *Hum Hered* 2005, **60**:156-163.
- 646    9.        Maciel P, Costa MC, Ferro A, Rousseau M, Santos CS, Gaspar C, Barros J, Rouleau GA,  
647            Coutinho P, Sequeiros J: **Improvement in the molecular diagnosis of Machado-Joseph**  
648            **disease.** *Arch Neurol* 2001, **58**:1821-1827.
- 649    10.        Alves S, Nascimento-Ferreira I, Auregan G, Hassig R, Dufour N, Brouillet E, Pedroso de Lima  
650            MC, Hantraye P, Pereira de Almeida L, Deglon N: **Allele-specific RNA silencing of mutant**  
651            **ataxin-3 mediates neuroprotection in a rat model of Machado-Joseph disease.** *PLoS*  
652            *One* 2008, **3**:e3341.
- 653    11.        Alves S, Nascimento-Ferreira I, Dufour N, Hassig R, Auregan G, Nobrega C, Brouillet E,  
654            Hantraye P, Pedroso de Lima MC, Deglon N, de Almeida LP: **Silencing ataxin-3 mitigates**  
655            **degeneration in a rat model of Machado-Joseph disease: no role for wild-type ataxin-**  
656            **3?** *Hum Mol Genet* 2010, **19**:2380-2394.
- 657    12.        Ashraf NS, Duarte-Silva S, Shaw ED, Maciel P, Paulson HL, Teixeira-Castro A, Costa MDC:  
658            **Citalopram Reduces Aggregation of ATXN3 in a YAC Transgenic Mouse Model of**  
659            **Machado-Joseph Disease.** *Mol Neurobiol* 2019, **56**:3690-3701.
- 660    13.        Costa MD, Ashraf NS, Fischer S, Yang Y, Schapka E, Joshi G, McQuade TJ, Dharia RM,  
661            Dulchavsky M, Ouyang M, et al: **Unbiased screen identifies aripiprazole as a modulator**

- 662           **of abundance of the polyglutamine disease protein, ataxin-3.** *Brain* 2016, **139**:2891-  
663           2908.
- 664    14.   do Carmo Costa M, Luna-Cancelon K, Fischer S, Ashraf NS, Ouyang M, Dharia RM, Martin-  
665           Fishman L, Yang Y, Shakkottai VG, Davidson BL, et al: **Toward RNAi Therapy for the**  
666           **Polyglutamine Disease Machado-Joseph Disease.** *Mol Ther* 2013, **21**:1898-1908.
- 667    15.   McLoughlin HS, Moore LR, Chopra R, Komlo R, McKenzie M, Blumenstein KG, Zhao H,  
668           Kordasiewicz HB, Shakkottai VG, Paulson HL: **Oligonucleotide therapy mitigates disease**  
669           **in spinocerebellar ataxia type 3 mice.** *Ann Neurol* 2018, **84**:64-77.
- 670    16.   Moore LR, Rajpal G, Dillingham IT, Qutob M, Blumenstein KG, Gattis D, Hung G, Kordasiewicz  
671           HB, Paulson HL, McLoughlin HS: **Evaluation of Antisense Oligonucleotides Targeting**  
672           **ATXN3 in SCA3 Mouse Models.** *Mol Ther Nucleic Acids* 2017, **7**:200-210.
- 673    17.   Nobrega C, Nascimento-Ferreira I, Onofre I, Albuquerque D, Hirai H, Deglon N, de Almeida  
674           LP: **Silencing mutant ataxin-3 rescues motor deficits and neuropathology in machado-**  
675           **joseph disease transgenic mice.** *PLoS One* 2013, **8**:e52396.
- 676    18.   Rodriguez-Lebron E, Costa MD, Luna-Cancelon K, Peron TM, Fischer S, Boudreau RL,  
677           Davidson BL, Paulson HL: **Silencing Mutant ATXN3 Expression Resolves Molecular**  
678           **Phenotypes in SCA3 Transgenic Mice.** *Mol Ther* 2013, **21**:1909-1918.
- 679    19.   Toonen LJA, Rigo F, van Attikum H, van Roon-Mom WMC: **Antisense Oligonucleotide-**  
680           **Mediated Removal of the Polyglutamine Repeat in Spinocerebellar Ataxia Type 3**  
681           **Mice.** *Mol Ther Nucleic Acids* 2017, **8**:232-242.
- 682    20.   Jacob RT, Larsen MJ, Larsen SD, Kirchoff PD, Sherman DH, Neubig RR: **MScreen: an**  
683           **integrated compound management and high-throughput screening data storage and**  
684           **analysis system.** *J Biomol Screen* 2012, **17**:1080-1087.

- 685 21. Winborn BJ, Travis SM, Todi SV, Scaglione KM, Xu P, Williams AJ, Cohen RE, Peng J, Paulson  
686 HL: **The deubiquitinating enzyme ataxin-3, a polyglutamine disease protein, edits**  
687 **Lys63 linkages in mixed linkage ubiquitin chains.** *J Biol Chem* 2008, **283**:26436-26443.
- 688 22. Paulson HL, Das SS, Crino PB, Perez MK, Patel SC, Gotsdiner D, Fischbeck KH, Pittman RN:  
689 **Machado-Joseph disease gene product is a cytoplasmic protein widely expressed in**  
690 **brain.** *Ann Neurol* 1997, **41**:453-462.
- 691 23. Burr AA, Tsou WL, Ristic G, Todi SV: **Using membrane-targeted green fluorescent**  
692 **protein to monitor neurotoxic protein-dependent degeneration of Drosophila eyes.** *J*  
693 *Neurosci Res* 2014, **92**:1100-1109.
- 694 24. Das B, Rajagopalan S, Joshi GS, Xu L, Luo D, Andersen JK, Todi SV, Dutta AK: **A novel iron**  
695 **(II) preferring dopamine agonist chelator D-607 significantly suppresses alpha-syn-**  
696 **and MPTP-induced toxicities in vivo.** *Neuropharmacology* 2017, **123**:88-99.
- 697 25. Tsou WL, Hosking RR, Burr AA, Sutton JR, Ouyang M, Du X, Gomez CM, Todi SV: **DnaJ-1 and**  
698 **karyopherin alpha3 suppress degeneration in a new Drosophila model of**  
699 **Spinocerebellar Ataxia Type 6.** *Hum Mol Genet* 2015, **24**:4385-4396.
- 700 26. Tsou WL, Qiblawi SH, Hosking RR, Gomez CM, Todi SV: **Polyglutamine length-dependent**  
701 **toxicity from alpha1ACT in Drosophila models of spinocerebellar ataxia type 6.** *Biol*  
702 *Open* 2016, **5**:1770-1775.
- 703 27. Yedlapudi D, Joshi GS, Luo D, Todi SV, Dutta AK: **Inhibition of alpha-synuclein**  
704 **aggregation by multifunctional dopamine agonists assessed by a novel in vitro assay**  
705 **and an in vivo Drosophila synucleinopathy model.** *Sci Rep* 2016, **6**:38510.
- 706 28. Sutton JR, Blount JR, Libohova K, Tsou WL, Joshi GS, Paulson HL, Costa MDC, Scaglione KM,  
707 Todi SV: **Interaction of the polyglutamine protein ataxin-3 with Rad23 regulates**  
708 **toxicity in Drosophila models of Spinocerebellar Ataxia Type 3.** *Hum Mol Genet* 2017,  
709 **26**:1419-1431.



- 710 29. Nascimento-Ferreira I, Nobrega C, Vasconcelos-Ferreira A, Onofre I, Albuquerque D,  
711 Aveleira C, Hirai H, Deglon N, Pereira de Almeida L: **Beclin 1 mitigates motor and**  
712 **neuropathological deficits in genetic mouse models of Machado-Joseph disease.** *Brain*  
713 2013, **136**:2173-2188.
- 714 30. Nascimento-Ferreira I, Santos-Ferreira T, Sousa-Ferreira L, Auregan G, Onofre I, Alves S,  
715 Dufour N, Colomer Gould VF, Koeppen A, Deglon N, Pereira de Almeida L: **Overexpression**  
716 **of the autophagic beclin-1 protein clears mutant ataxin-3 and alleviates Machado-**  
717 **Joseph disease.** *Brain* 2011, **134**:1400-1415.
- 718 31. Ristic G, Sutton JR, Libohova K, Todi SV: **Toxicity and aggregation of the polyglutamine**  
719 **disease protein, ataxin-3 is regulated by its binding to VCP/p97 in Drosophila**  
720 **melanogaster.** *Neurobiol Dis* 2018, **116**:78-92.
- 721 32. Perrimon N, Bonini NM, Dhillon P: **Fruit flies on the front line: the translational impact**  
722 **of Drosophila.** *Dis Model Mech* 2016, **9**:229-231.
- 723 33. Brand AH, Perrimon N: **Targeted gene expression as a means of altering cell fates and**  
724 **generating dominant phenotypes.** *Development* 1993, **118**:401-415.
- 725 34. Cenciarelli C, Chiaur DS, Guardavaccaro D, Parks W, Vidal M, Pagano M: **Identification of a**  
726 **family of human F-box proteins.** *Curr Biol* 1999, **9**:1177-1179.
- 727 35. Moore LR, Keller L, Bushart DD, Delatorre R, Li D, McLoughlin HS, Costa MC, Shakkottai VG,  
728 Smith GD, Paulson HL: **Antisense oligonucleotide therapy rescues aggresome**  
729 **formation in a novel Spinocerebellar Ataxia type 3 human embryonic stem cell line.**  
730 *bioRxiv* 2019.
- 731 36. Ashraf NS, Duarte-Silva S, Shaw ED, Maciel P, Paulson HL, Teixeira-Castro A, Costa MDC:  
732 **Citalopram Reduces Aggregation of ATXN3 in a YAC Transgenic Mouse Model of**  
733 **Machado-Joseph Disease.** *Mol Neurobiol* 2018.

- 734 37. Jana NR, Dikshit P, Goswami A, Kotliarova S, Murata S, Tanaka K, Nukina N: **Co-chaperone**  
735 **CHIP associates with expanded polyglutamine protein and promotes their**  
736 **degradation by proteasomes.** *J Biol Chem* 2005, **280**:11635-11640.
- 737 38. Matsumoto M, Yada M, Hatakeyama S, Ishimoto H, Tanimura T, Tsuji S, Kakizuka A,  
738 Kitagawa M, Nakayama KI: **Molecular clearance of ataxin-3 is regulated by a**  
739 **mammalian E4.** *EMBO J* 2004, **23**:659-669.
- 740 39. Mishra A, Dikshit P, Purkayastha S, Sharma J, Nukina N, Jana NR: **E6-AP promotes**  
741 **misfolded polyglutamine proteins for proteasomal degradation and suppresses**  
742 **polyglutamine protein aggregation and toxicity.** *J Biol Chem* 2008, **283**:7648-7656.
- 743 40. Sugiura A, Yonashiro R, Fukuda T, Matsushita N, Nagashima S, Inatome R, Yanagi S: **A**  
744 **mitochondrial ubiquitin ligase MITOL controls cell toxicity of polyglutamine-**  
745 **expanded protein.** *Mitochondrion* 2010, **11**:139-146.
- 746 41. Tsai YC, Fishman PS, Thakor NV, Oyler GA: **Parkin facilitates the elimination of expanded**  
747 **polyglutamine proteins and leads to preservation of proteasome function.** *J Biol Chem*  
748 2003, **278**:22044-22055.
- 749 42. Ying Z, Wang H, Fan H, Zhu X, Zhou J, Fei E, Wang G: **Gp78, an ER associated E3, promotes**  
750 **SOD1 and ataxin-3 degradation.** *Hum Mol Genet* 2009, **18**:4268-4281.
- 751 43. Berger Z, Ravikumar B, Menzies FM, Oroz LG, Underwood BR, Pangalos MN, Schmitt I,  
752 Wullner U, Evert BO, O'Kane CJ, Rubinsztein DC: **Rapamycin alleviates toxicity of**  
753 **different aggregate-prone proteins.** *Hum Mol Genet* 2006, **15**:433-442.
- 754 44. Menzies FM, Huebener J, Renna M, Bonin M, Riess O, Rubinsztein DC: **Autophagy induction**  
755 **reduces mutant ataxin-3 levels and toxicity in a mouse model of spinocerebellar**  
756 **ataxia type 3.** *Brain* 2010, **133**:93-104.

- 757 45. Boeddrich A, Gaumer S, Haacke A, Tzvetkov N, Albrecht M, Evert BO, Muller EC, Lurz R,  
758 Breuer P, Schugardt N, et al: **An arginine/lysine-rich motif is crucial for VCP/p97-**  
759 **mediated modulation of ataxin-3 fibrillogenesis.** *EMBO J* 2006, **25**:1547-1558.
- 760 46. Blount JR, Tsou WL, Ristic G, Burr AA, Ouyang M, Galante H, Scaglione KM, Todi SV:  
761 **Ubiquitin-binding site 2 of ataxin-3 prevents its proteasomal degradation by**  
762 **interacting with Rad23.** *Nat Commun* 2014, **5**:4638.
- 763 47. Burnett B, Li F, Pittman RN: **The polyglutamine neurodegenerative protein ataxin-3**  
764 **binds polyubiquitylated proteins and has ubiquitin protease activity.** *Hum Mol Genet*  
765 2003, **12**:3195-3205.
- 766 48. Chai Y, Berke SS, Cohen RE, Paulson HL: **Poly-ubiquitin binding by the polyglutamine**  
767 **disease protein ataxin-3 links its normal function to protein surveillance pathways.** *J*  
768 *Biol Chem* 2004, **279**:3605-3611.
- 769 49. Donaldson KM, Li W, Ching KA, Batalov S, Tsai CC, Joazeiro CA: **Ubiquitin-mediated**  
770 **sequestration of normal cellular proteins into polyglutamine aggregates.** *Proc Natl*  
771 *Acad Sci U S A* 2003, **100**:8892-8897.
- 772 50. Todi SV, Winborn BJ, Scaglione KM, Blount JR, Travis SM, Paulson HL: **Ubiquitination**  
773 **directly enhances activity of the deubiquitinating enzyme ataxin-3.** *Embo J* 2009,  
774 **28**:372-382.
- 775 51. Nicastro G, Masino L, Esposito V, Menon RP, De Simone A, Fraternali F, Pastore A: **Josephin**  
776 **domain of ataxin-3 contains two distinct ubiquitin-binding sites.** *Biopolymers* 2009,  
777 **91**:1203-1214.
- 778 52. Scheel H, Tomiuk S, Hofmann K: **Elucidation of ataxin-3 and ataxin-7 function by**  
779 **integrative bioinformatics.** *Hum Mol Genet* 2003, **12**:2845-2852.
- 780 53. Aggarwal BB: **Signalling pathways of the TNF superfamily: a double-edged sword.** *Nat*  
781 *Rev Immunol* 2003, **3**:745-756.

- 782 54. Subramaniam S, Unsicker K: **ERK and cell death: ERK1/2 in neuronal death.** *FEBS J* 2010,  
783 **277:22-29.**
- 784 55. Ramani B, Panwar B, Moore LR, Wang B, Huang R, Guan Y, Paulson HL: **Comparison of**  
785 **spinocerebellar ataxia type 3 mouse models identifies early gain-of-function, cell-**  
786 **autonomous transcriptional changes in oligodendrocytes.** *Hum Mol Genet* 2017,  
787 **26:3362-3374.**
- 788 56. Li YX, Sibon OCM, Dijkers PF: **Inhibition of NF-kappaB in astrocytes is sufficient to delay**  
789 **neurodegeneration induced by proteotoxicity in neurons.** *J Neuroinflammation* 2018,  
790 **15:261.**
- 791 57. Mendonca LS, Nobrega C, Tavino S, Brinkhaus M, Matos C, Tome S, Moreira R, Henriques D,  
792 Kaspar BK, de Almeida LP: **Ibuprofen enhances synaptic function and neural**  
793 **progenitors proliferation markers and improves neuropathology and motor**  
794 **coordination in Machado-Joseph disease models.** *Hum Mol Genet* 2019.
- 795 58. Siepka SM, Yoo SH, Park J, Song W, Kumar V, Hu Y, Lee C, Takahashi JS: **Circadian mutant**  
796 **Overtime reveals F-box protein FBXL3 regulation of cryptochrome and period gene**  
797 **expression.** *Cell* 2007, **129:1011-1023.**
- 798 59. Lamia KA, Sachdeva UM, DiTacchio L, Williams EC, Alvarez JG, Egan DF, Vasquez DS,  
799 Juguilon H, Panda S, Shaw RJ, et al: **AMPK regulates the circadian clock by cryptochrome**  
800 **phosphorylation and degradation.** *Science* 2009, **326:437-440.**
- 801 60. Correia SP, Chan AB, Vaughan M, Zolboot N, Perea V, Huber AL, Kriebs A, Moresco JJ, Yates  
802 JR, 3rd, Lamia KA: **The circadian E3 ligase complex SCF(FBXL3+CRY) targets TLK2.** *Sci*  
803 *Rep* 2019, **9:198.**
- 804 61. Ansar M, Paracha SA, Serretti A, Sarwar MT, Khan J, Ranza E, Falconnet E, Iwaszkiewicz J,  
805 Shah SF, Qaisar AA, et al: **Biallelic variants in FBXL3 cause intellectual disability,**  
806 **delayed motor development and short stature.** *Hum Mol Genet* 2019, **28:972-979.**

- 807 62. Chen ZS, Wong AKY, Cheng TC, Koon AC, Chan HYE: **FipoQ/FBX033, a Cullin-1-based**  
808 **ubiquitin ligase complex component modulates ubiquitination and solubility of**  
809 **polyglutamine disease protein.** *J Neurochem* 2019.
- 810 63. Ferro A, Carvalho AL, Teixeira-Castro A, Almeida C, Tome RJ, Cortes L, Rodrigues AJ,  
811 Logarinho E, Sequeiros J, Macedo-Ribeiro S, Maciel P: **NEDD8: a new ataxin-3 interactor.**  
812 *Biochim Biophys Acta* 2007, **1773**:1619-1627.

813

814

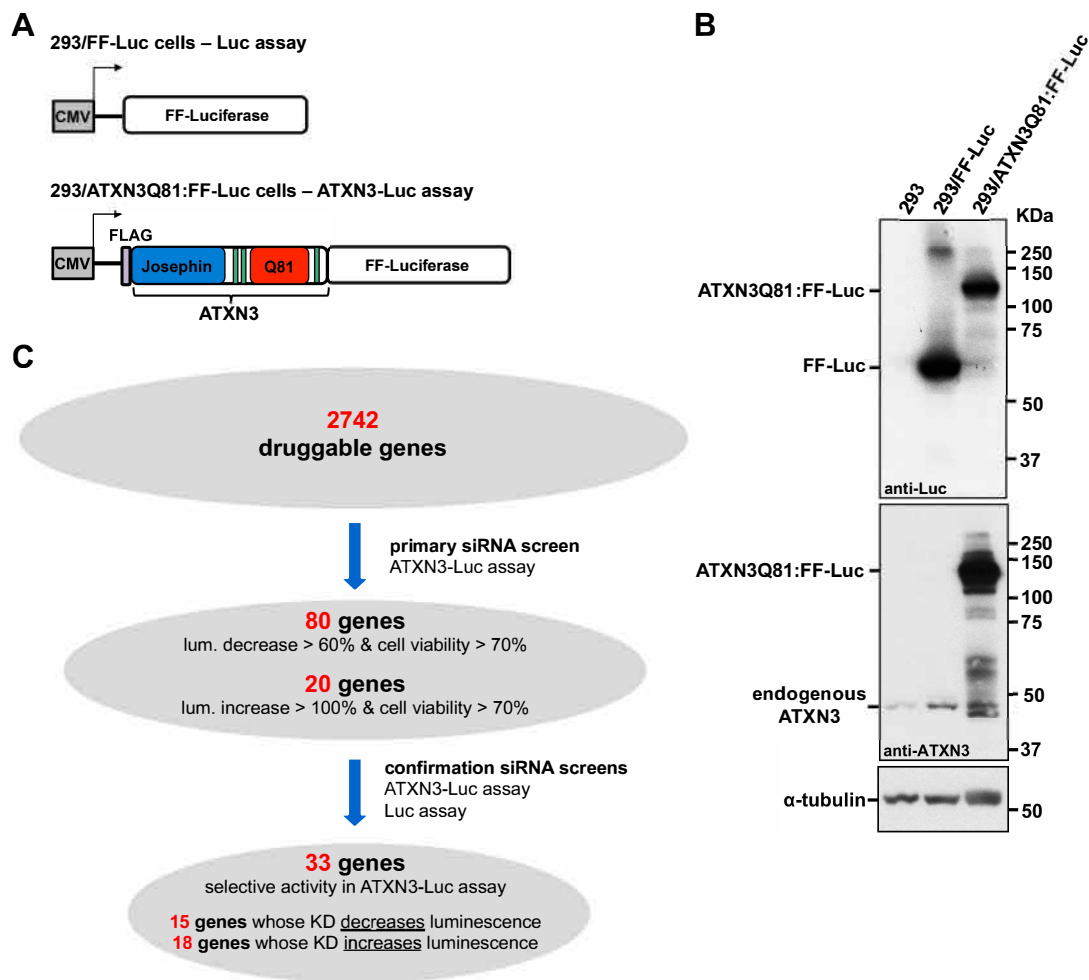

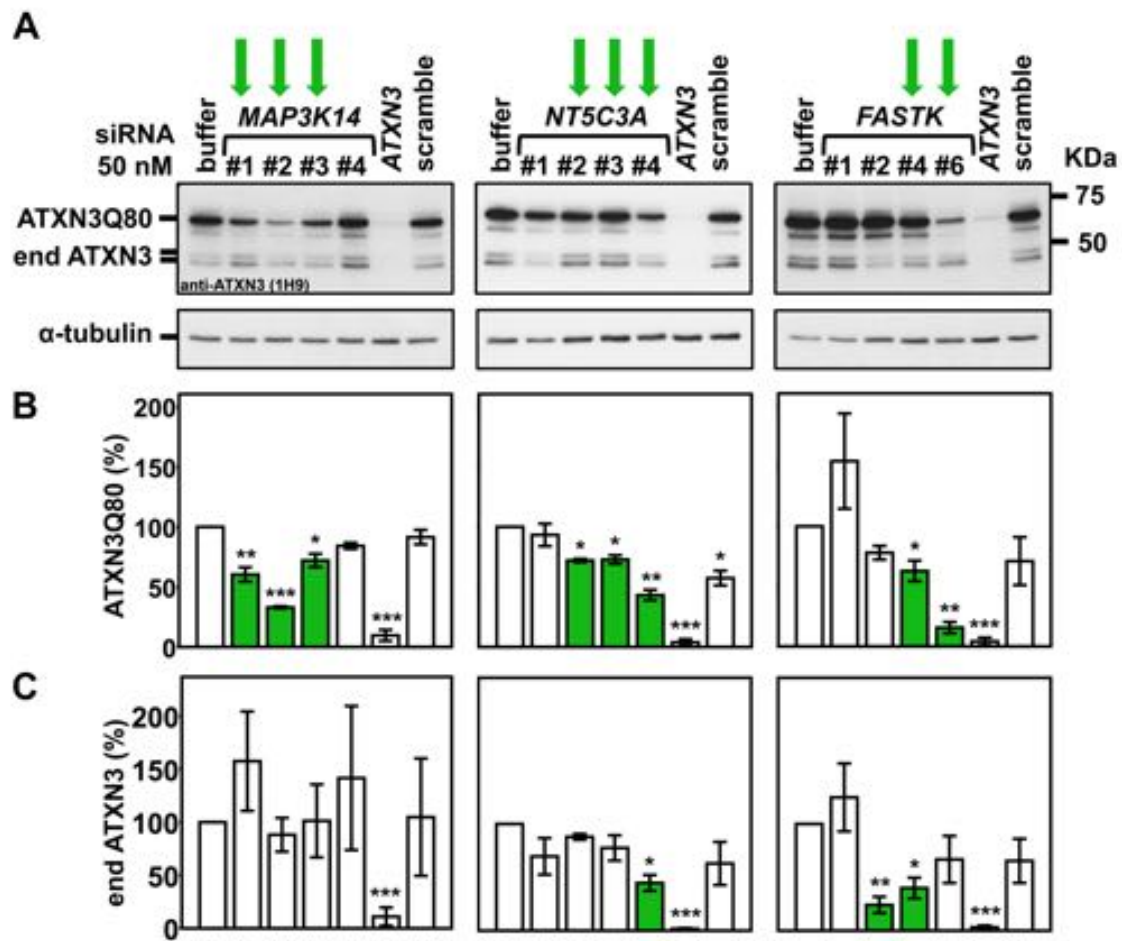

**Figure 3**

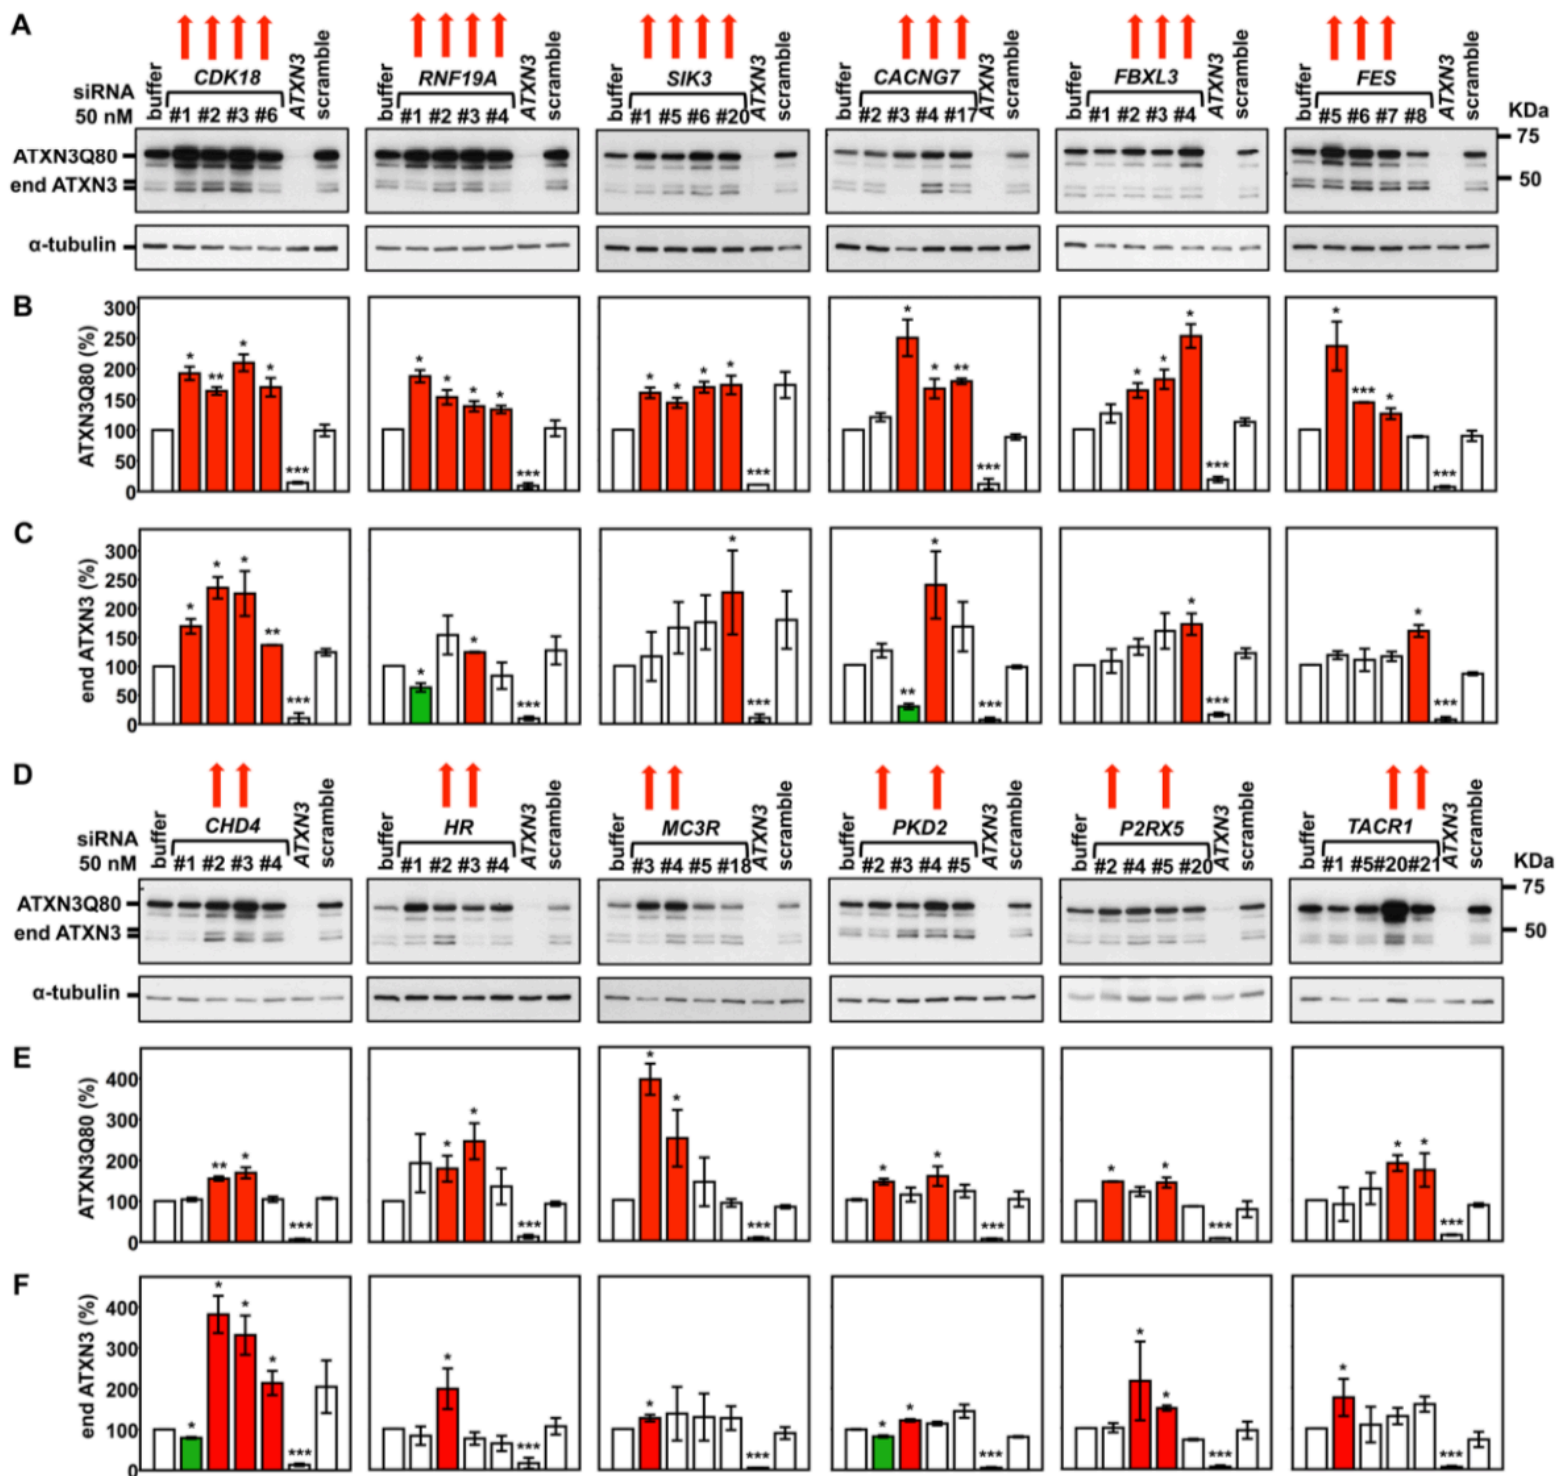



Figure 4

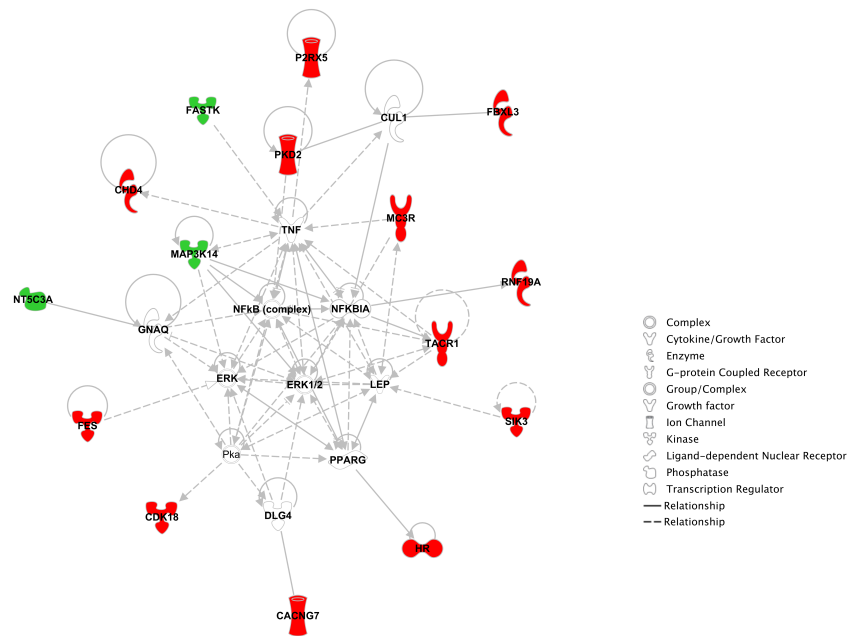

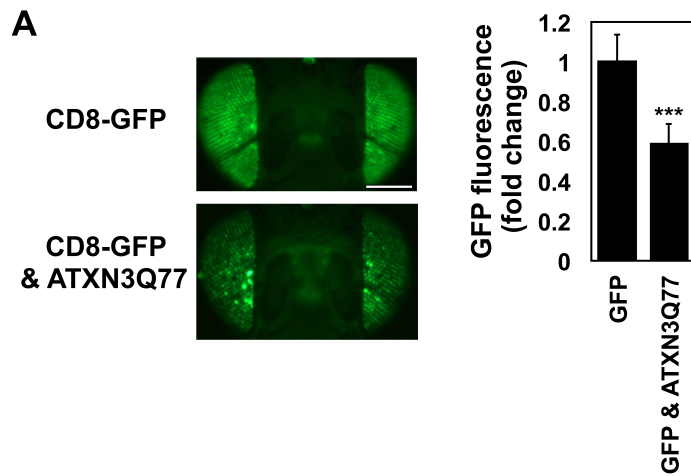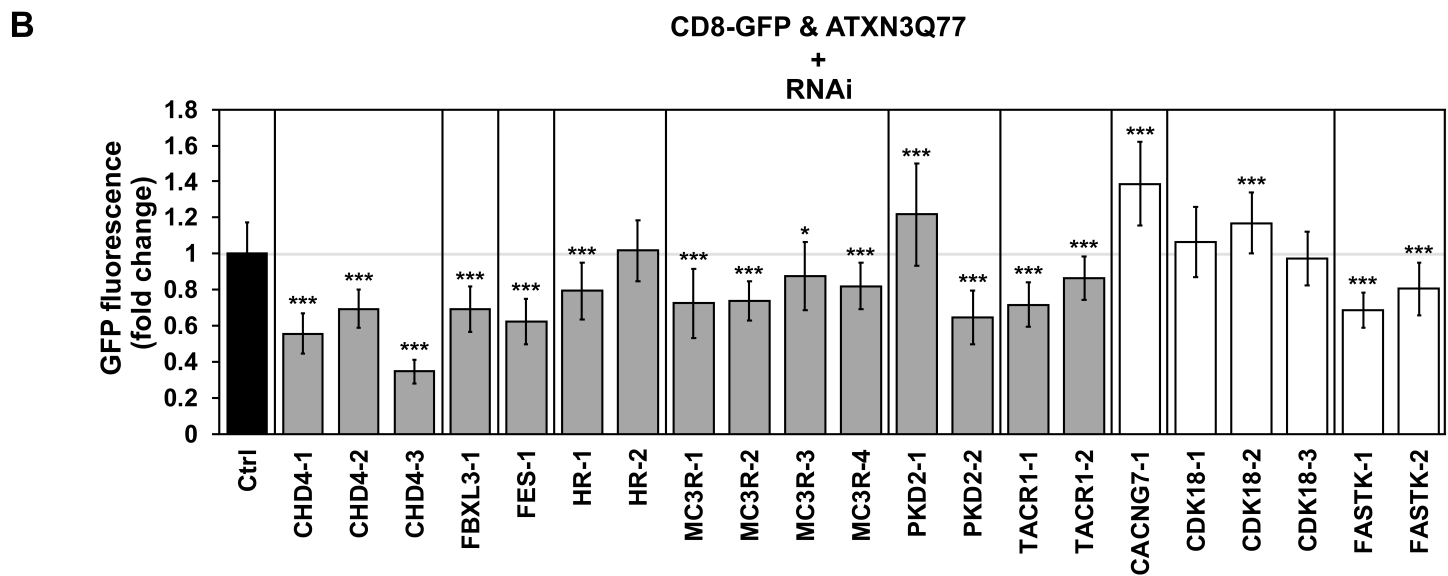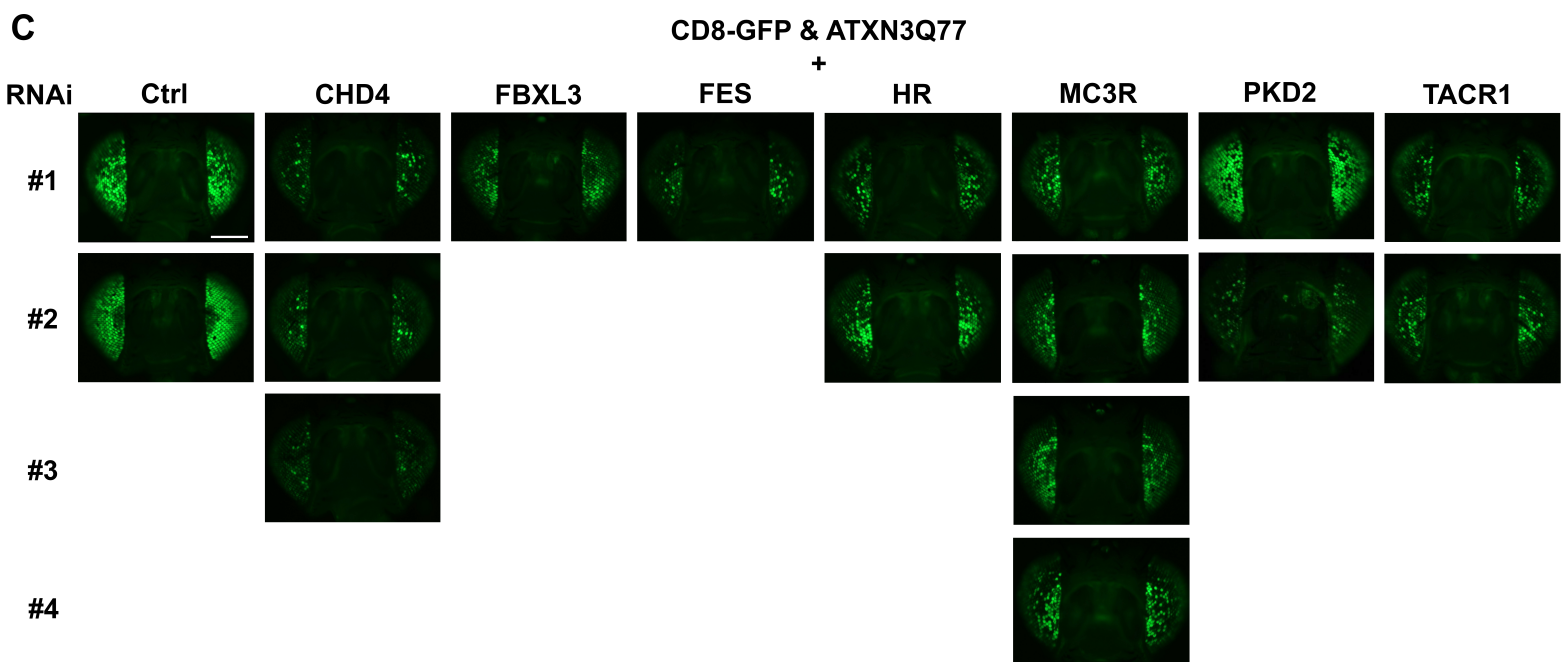

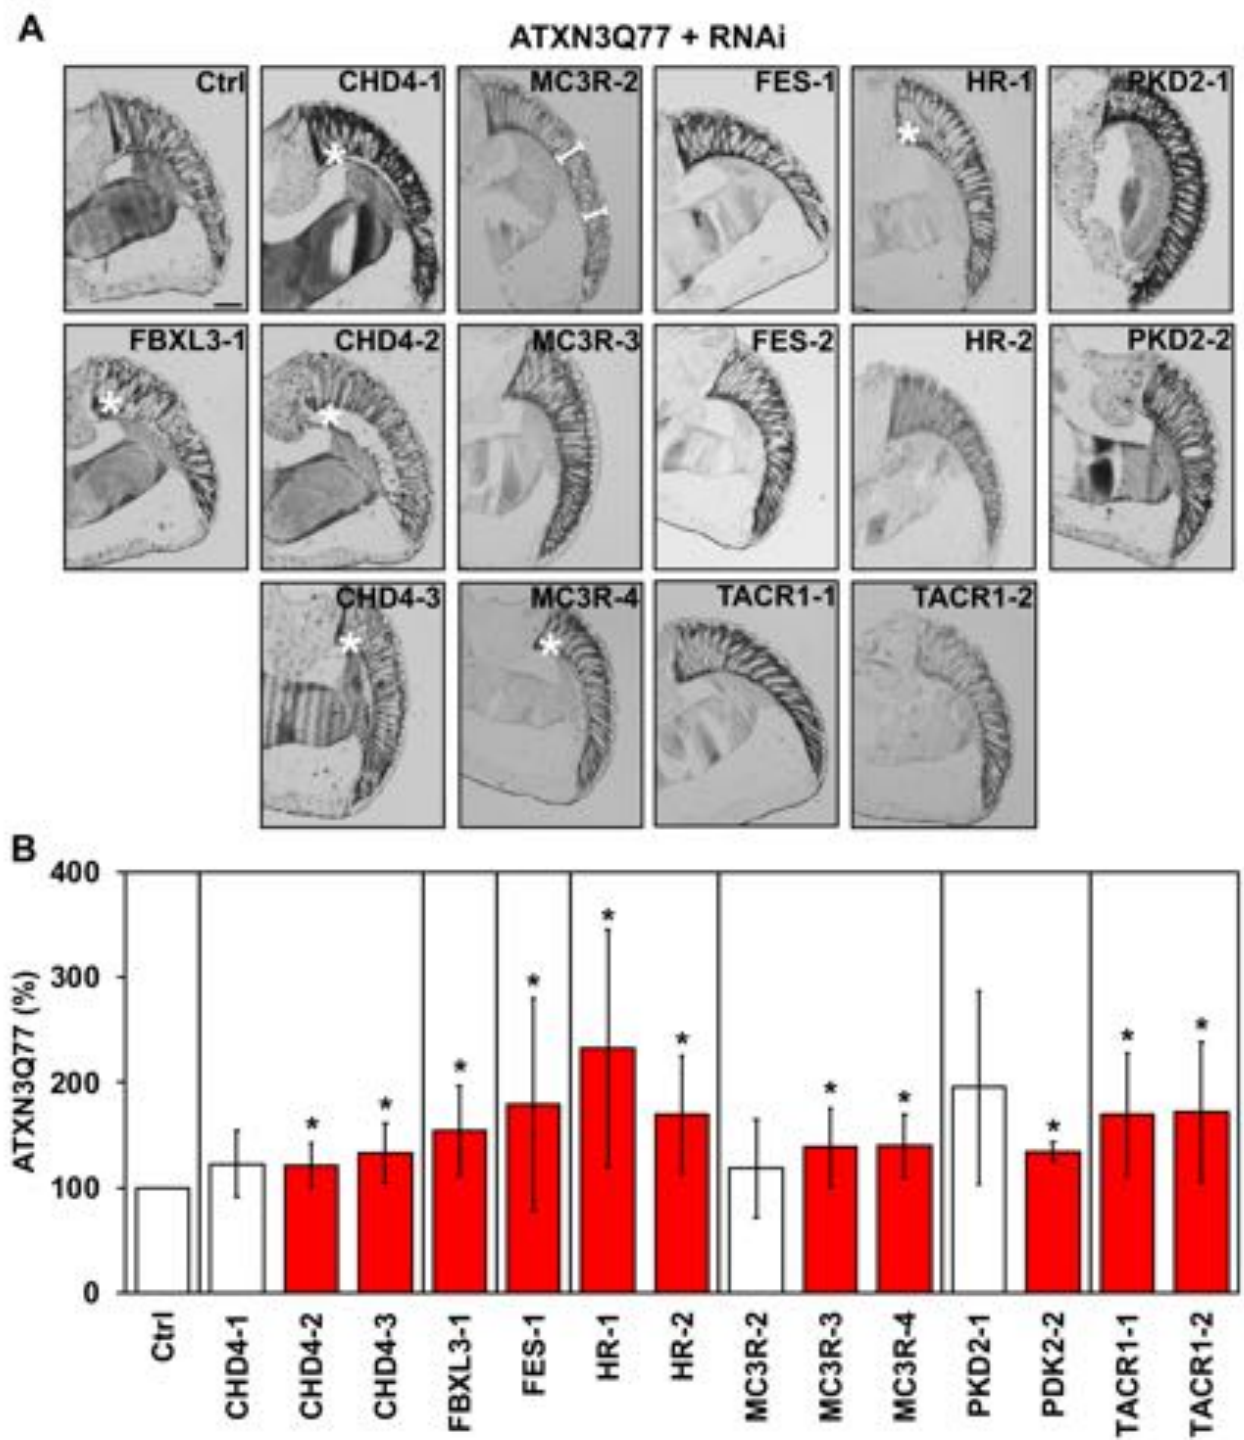

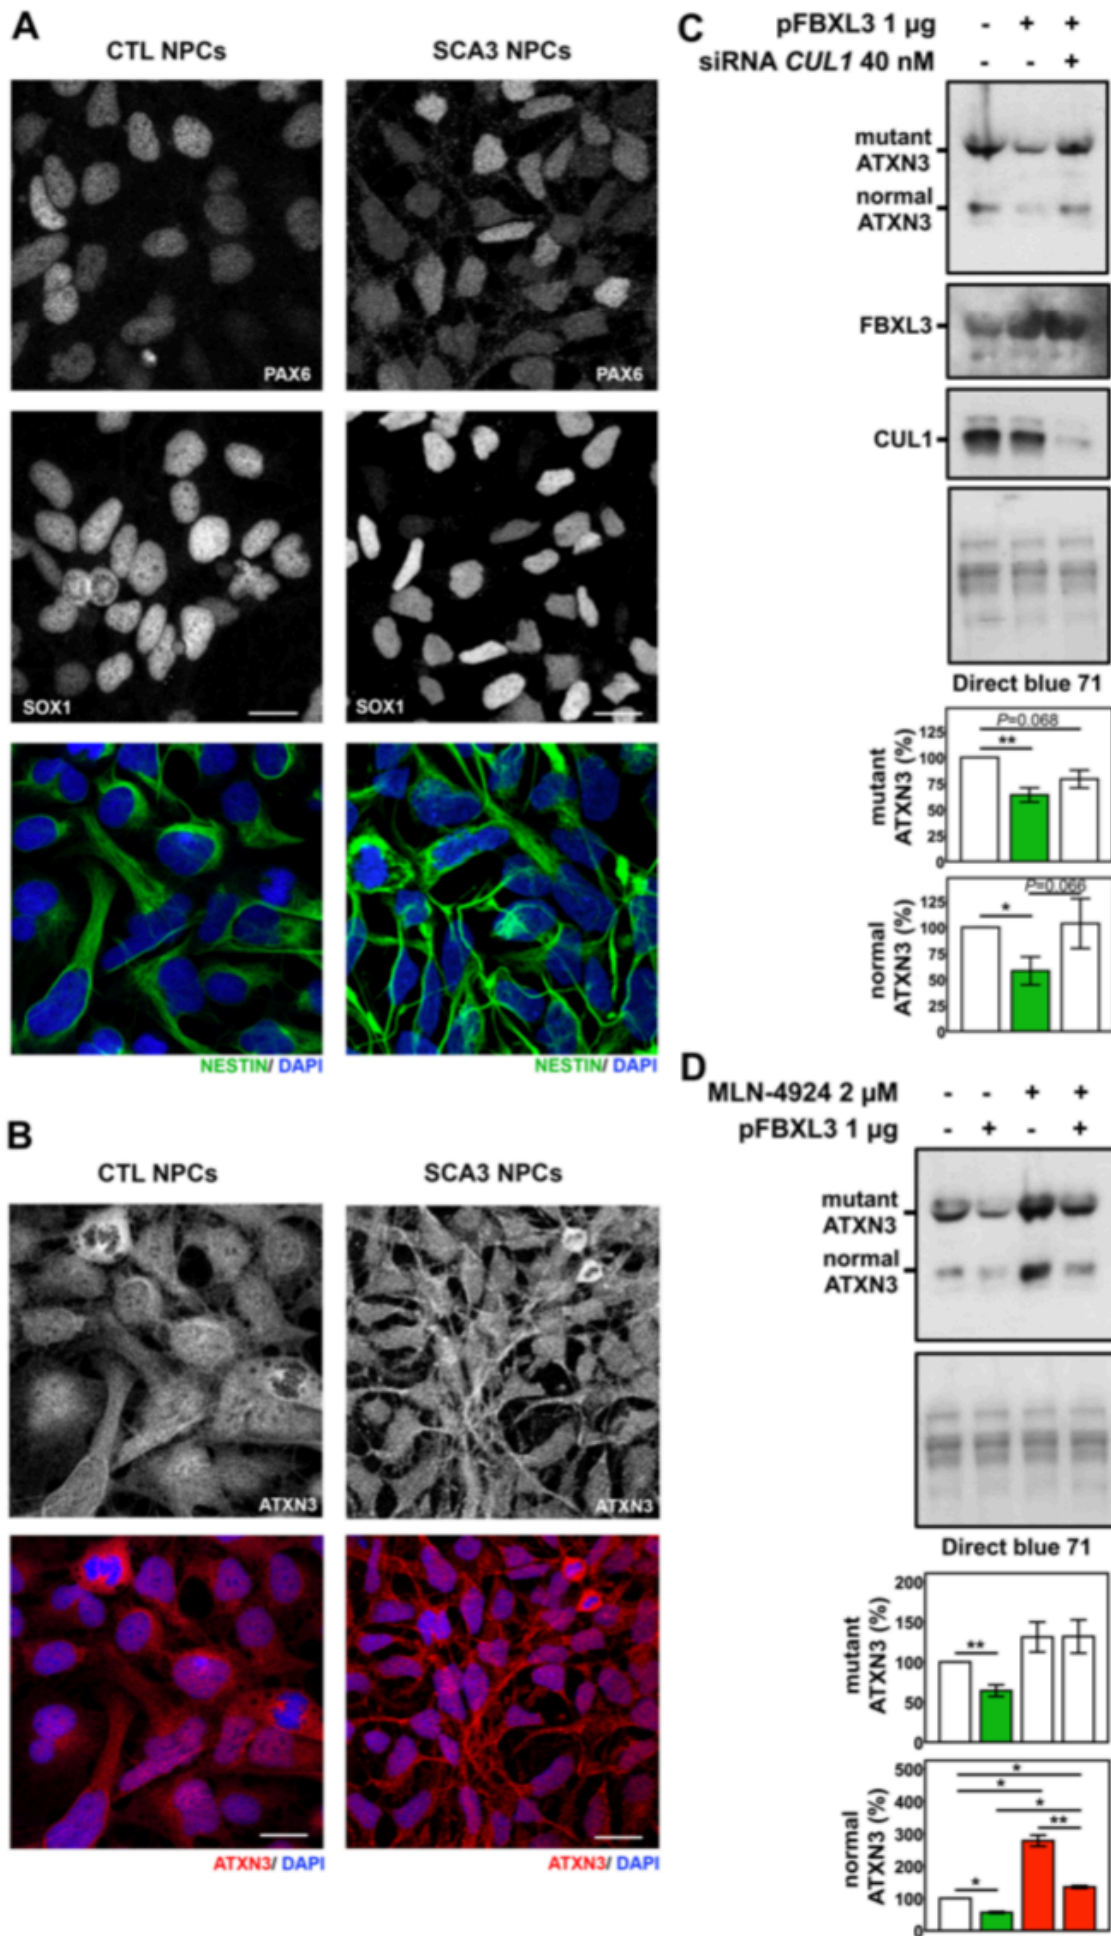

**Table 1. Druggable genes that passed the secondary screen in ATXN3Q80 cells.**

| <b>Gene Symbol</b> | <b>Entrez Gene Name</b>                                   | <b>Entrez Gene ID</b> | <b>Cell location</b> | <b>Protein function</b>    |
|--------------------|-----------------------------------------------------------|-----------------------|----------------------|----------------------------|
| <i>CACNG7</i>      | calcium voltage-gated channel auxiliary subunit gamma 7   | 59284                 | Plasma Membrane      | ion channel                |
| <i>CDK18</i>       | cyclin dependent kinase 18                                | 5129                  | Cytoplasm            | kinase                     |
| <i>CHD4</i>        | chromodomain helicase DNA binding protein 4               | 1108                  | Nucleus              | enzyme                     |
| <i>FASTK</i>       | Fas activated serine/threonine kinase                     | 10922                 | Cytoplasm            | kinase                     |
| <i>FBXL3</i>       | F-box and leucine rich repeat protein 3                   | 26224                 | Nucleus              | enzyme                     |
| <i>FES</i>         | FES proto-oncogene, tyrosine kinase                       | 2242                  | Cytoplasm            | kinase                     |
| <i>HR</i>          | HR, lysine demethylase and nuclear receptor corepressor   | 55806                 | Nucleus              | transcription regulator    |
| <i>MAP3K14</i>     | mitogen-activated protein kinase kinase kinase 14         | 9020                  | Cytoplasm            | kinase                     |
| <i>MC3R</i>        | melanocortin 3 receptor                                   | 4159                  | Plasma Membrane      | G-protein coupled receptor |
| <i>NT5C3A</i>      | 5'-nucleotidase, cytosolic IIIA                           | 51251                 | Cytoplasm            | phosphatase                |
| <i>P2RX5</i>       | purinergic receptor P2X 5                                 | 5026                  | Plasma Membrane      | ion channel                |
| <i>PKD2</i>        | polycystin 2, transient receptor potential cation channel | 5311                  | Plasma Membrane      | ion channel                |
| <i>RNF19A</i>      | ring finger protein 19A, RBR E3 ubiquitin protein ligase  | 25897                 | Nucleus              | enzyme                     |
| <i>SIK3</i>        | SIK family kinase 3                                       | 23387                 | Cytoplasm            | kinase                     |
| <i>TACR1</i>       | tachykinin receptor 1                                     | 6869                  | Plasma Membrane      | G-protein coupled receptor |
